1 **Activation and *in vivo* evolution of the MAIT cell transcriptome in mice**  
2 **and humans reveals diverse functionality**

3 **Authors:** Timothy SC Hinks<sup>1,2\*</sup>, Emanuele Marchi<sup>3</sup>, Maisha Jabeen<sup>2</sup>, Moshe Olshansky<sup>4</sup>,  
4 Ayako Kurioka<sup>3</sup>, Troi J Pediongco<sup>1</sup>, Bronwyn S Meehan<sup>1</sup>, Lyudmila Kostenko<sup>1</sup>, Stephen J  
5 Turner<sup>4</sup>, Alexandra J Corbett<sup>1</sup>, Zhenjun Chen<sup>1</sup>, Paul Klenerman<sup>5</sup> and James McCluskey<sup>1</sup>

6 **Affiliations**

7 1. Department of Microbiology and Immunology, Peter Doherty Institute for Infection and  
8 Immunity, University of Melbourne, Parkville, Victoria 3000, Australia.

9 2. Respiratory Medicine Unit and National Institute for Health Research (NIHR) Oxford  
10 Biomedical Research Centre (BRC), Nuffield Department of Medicine Experimental  
11 Medicine, University of Oxford, OX3 9DU, Oxfordshire, UK

12 3. Peter Medawar Building for Pathogen Research and Translational Gastroenterology  
13 Unit, Nuffield Department of Clinical Medicine, University of Oxford, OX3 3SY

14 4. Infection and Immunity Program and The Department of Biochemistry and Molecular  
15 Biology, Biomedicine Discovery Institute, Monash University, Clayton, Australia.

16

17 **Contact information:**

18 \* Corresponding author and lead contact: Dr TSC Hinks, Respiratory Medicine Unit, NDM  
19 Experimental Medicine, University of Oxford, Level 7, John Radcliffe Hospital, Oxford,  
20 OX3 9DU [timothy.hinks@ndm.ox.ac.uk](mailto:timothy.hinks@ndm.ox.ac.uk); +44 1865 220885 @HinksLab

21

## 22 **Abstract**

23 Mucosal-associated invariant T (MAIT) cells are MR1-restricted innate-like T cells  
24 conserved across mammalian species, including mice and humans. By sequencing RNA  
25 from sorted MR1-5-OP-RU tetramer<sup>+</sup> cells derived from either human blood or murine  
26 lungs, we define the basic transcriptome of an activated MAIT cell in both species and  
27 demonstrate how this profile changes during resolution and reinfection phases of infection.  
28 We observe strong similarities between MAIT cells in humans and mice. Compared with  
29 previously published T cell transcriptomes, MAIT cells displayed most similarity to iNKT  
30 cells when activated, but to  $\gamma\delta$  T cells, after resolution of infection. In both species  
31 activation leads to strong expression of pro-inflammatory cytokines and chemokines, and  
32 also a strong tissue repair signature, recently described in murine commensal-specific H2-  
33 M3-restricted T cells. These data define the requirements for, and consequences of, MAIT  
34 cell activation, revealing a tissue repair phenotype expressed upon MAIT cell activation in  
35 both species.

36

## 37 **Key words**

38 Mucosal-associated invariant T cell, T cell, transcriptome, MHC-related protein 1,  
39 activation, lung, human, mouse, riboflavin.

40

41 Mucosal-associated invariant T (MAIT) cells are innate-like T cells which express a ‘semi-  
42 invariant’  $\alpha\beta$  T cell receptor (TCR) and recognise metabolic derivatives of riboflavin  
43 biosynthesis<sup>1-3</sup> presented on the restriction molecule major histocompatibility complex  
44 (MHC)-related protein-1 (MR1)<sup>4,5</sup>. These antigens, which include the potent MAIT cell  
45 ligand 5-(2-oxopropylideneamino)-6-D-ribitylaminouracil (5-OP-RU)<sup>6</sup>, are produced by a  
46 wide variety of bacteria, mycobacteria and yeasts<sup>1,7</sup>, but are absent from mammals, and  
47 therefore allows host – pathogen discrimination. MAIT cells have a strong pro-  
48 inflammatory phenotype, and produce interferon- $\gamma$  (IFN- $\gamma$ ), TNF and IL-17A after phorbol  
49 myristate acetate (PMA) and ionomycin stimulation<sup>8</sup>.

50 Whilst baseline frequencies of MAIT cells are low in specific-pathogen free  
51 C57BL/6 mice, we, and others, have previously shown that MAIT cells can be activated  
52 and expand *in vivo* in response to pulmonary infection with specific intracellular bacteria  
53 expressing the riboflavin pathway – *Salmonella* Typhimurium<sup>9</sup>, *Legionella spp*<sup>10</sup>, and  
54 *Francisella tularensis*<sup>11,12</sup> – or in response to synthetic 5-OP-RU accompanied by a Toll-  
55 like receptor agonst<sup>9</sup>, providing valuable models to dissect MAIT cell biology.

56 To date the requirements for TCR-dependent activation of MAIT cells *in vivo* have  
57 not been systematically characterised, nor have the consequences of such activation been  
58 fully defined. Here we have used MR1 tetramers<sup>2</sup> loaded with 5-OP-RU to specifically  
59 identify MAIT cells from human peripheral blood and murine lungs, allowing us to assess  
60 the requirements for, and consequences of, MAIT cell activation *ex vivo* and *in vivo*. Using  
61 a transcriptomic approach on sorted MR1-5-OP-RU tetramer<sup>+</sup> cells we define the  
62 transcriptome of an activated MAIT cell in both species and explore how this changes  
63 during the resolution and reinfection phases of infection.

64 Our data reveal strong similarities between MAIT cells in humans and in mice at a  
65 transcriptional level, show that MAIT cells displayed the closest similarities to invariant  
66 natural killer T (iNKT) cells when activated, but after resolution of infection were more  
67 comparable to  $\gamma\delta$  T cells, and reveal a previously unknown tissue repair phenotype  
68 expressed upon MAIT cell activation in both species.

69

## 70 **Results**

### 71 **Activation requirements of MAIT cells *in vivo***

72 First we aimed to test, systematically, the activation requirements of MAIT cells *in vivo* in  
73 mouse lungs. We have previously shown that pulmonary MAIT cell frequencies in mice  
74 can be markedly enhanced by intranasal administration of 5-OP-RU if it is co-administered  
75 with S-[2,3-bis(palmitoyloxy)propyl] cysteine (Pam2Cys), CpG ODN 1668 or  
76 polyinosinic:polycytidylic acid (poly I:C), which are agonists for TLR2/6, TLR9 and  
77 TLR3, respectively. We therefore investigated agonists for each of the murine TLRs, using  
78 the maximum doses presented in a literature review of previous studies of these  
79 compounds. All animals received the relevant TLR intranasally on day 0. In experimental  
80 animals this was administered in combination with 76 pmol 5-OP-RU on day 0, with  
81 repeated inoculae of 76 pmol 5-OP-RU on days 1, 2 and 4. Control mice received the same  
82 TLR ligand and 76 pmol of the non-activating MR1 ligand 6-formyl pterin (6-FP)  
83 according to the same schedule, or the TLR ligand alone (Supplementary Table S1). We  
84 observed 15-180-fold enrichment of pulmonary CD3<sup>+</sup>CD45.2<sup>+</sup>CD19<sup>-</sup>MR1-5-OP-RU  
85 tetramer<sup>+</sup> MAIT cell frequencies at day 7, after administration of 5-OP-RU with agonists

86 of TLR3 (high molecular weight poly I:C), TLR4 (Lipopolysaccharide from *E.coli*),  
87 TLR2/6 (FSL-1 (Pam2CGDPKHPKSF)) and TLR9 (CpG ODN1826), but not with  
88 agonists of TLR1/2 (Pam3CSK4), TLR2 (heat killed *Listeria monocytogenes*), TLR5  
89 (Flagellin from *S.typhimurium*), TLR7 (Imiquimod)(Figure 1), suggesting there is a  
90 specific and restricted range of danger signals that are capable of providing the necessary  
91 co-stimulus to drive MAIT cell accumulation in response to 5-OP-RU antigen.

92

### 93 **Transcriptomic profile of activated human and murine MAIT cells**

94 Having explored the requirements for activation of MAIT cells, we sought to describe in  
95 detail the consequences of their activation using a transcriptomic approach to define the  
96 basic transcriptome of a MAIT cell in both humans and mice and to determine how this is  
97 modulated by activation. Fresh human peripheral blood cells were obtained from three  
98 donors. These were cultured for 6 hours with (‘stimulated’) or without (‘unstimulated’) 10  
99 nM 5-OP-RU, magnetically enriched on MR1-tetramer<sup>+</sup> cells, and flow-sorted for RNA  
100 sequencing of live CD3<sup>+</sup>TCR V $\alpha$ 7.2<sup>+</sup> MR1-5-OP-RU tetramer<sup>+</sup> MAIT cells, and of  
101 unstimulated naïve live CD8<sup>+</sup>CD45RA<sup>+</sup> T cells as a comparator cell type (**Table 1**).

102 We have previously shown that pulmonary infection of mice with the intracellular  
103 pathogen *Legionella longbeachae* induces strong TCR-mediated MAIT cell activation, and  
104 that this plays a significant role in host immune protection, thus constituting a  
105 physiologically relevant model of *in vivo* MAIT cell activation. Using this model, which  
106 induces a rapid and sustained expansion of MAIT cells in the lung (Supplementary figure  
107 S1) we therefore included within the same sequencing experiment live pulmonary  
108 CD3<sup>+</sup>45.2<sup>+</sup>19<sup>-</sup>MR1-5-OP-RU tetramer<sup>+</sup> MAIT cells which were magnetically enriched and

109 flow-sorted from the lungs of mice 7 days after infection with  $1 \times 10^4$  CFU *L. longbeachae*  
110 ('acute'), or at least 12 weeks post infection ('resolution') or 7 days after a second  
111 intranasal infection with  $2 \times 10^4$  CFU *L. longbeachae* in mice that had recovered from  
112 infection 12 weeks previously ('reinfection'). Live  $CD3^+CD45.2^+CD19^-CD8^+CD44^-$   
113  $CD62L^+$  naïve T cells from uninfected mice were used as a comparator cell type.

114 The number of differentially expressed genes (DEG) in activated MAIT cells  
115 compared with naïve  $CD8^+$  T cells was 4613 genes in human 5-OP-RU-stimulated MAIT  
116 cells, and 3758 genes in acutely infected mice at a false discovery rate (FDR) p value of  
117  $<0.05$  and minimum  $\log_2$  fold change of  $\pm 1$  (Numbers of DEG are shown in Table 2; full  
118 lists of DEG are shown in Supplementary tables S2 and S3). These genes constitute the  
119 basic transcriptome of an activated MAIT cell in each species. To explore the nature of  
120 these gene profiles further we compared different activation states of MAIT cells. In  
121 humans 3227 genes were differentially expressed between stimulated and unstimulated  
122 MAIT cells and could therefore be considered the direct signature of TCR-mediated MAIT  
123 cell activation, whilst 968 genes were differentially expressed between unstimulated MAIT  
124 cells and naïve  $CD8^+$  T cells, and therefore are more related to constitutive differences  
125 between T cell lineages (Supplementary table S2). In mice 1889 genes were differentially  
126 expressed between acute infection and resolution of infection, analogous to the signature  
127 of TCR-mediated activation (Supplementary table S3).

128 Analysis of TCR genes over-represented in MAIT cells confirmed highly  
129 significant selective use of TRAV1-2 with TRBV6-4, TRBV6-1 and TRBV20-1 in humans  
130 and Trbv13-5 with Trav1 and Traj33 in mice, in MAIT cells compared naïve  $CD8^+$  T cells,  
131 as expected<sup>4,5,13,14</sup> (Supplementary tables S4, S5).

132 Focussed analysis of known cytokine genes confirmed a strong upregulation of  
133 several pro-inflammatory type 1 and type 17 cytokines, especially CSF2 (GM-CSF), IL-  
134 17A, LIF, TNF, IFN- $\gamma$ , and IL-17F) which were highly upregulated in both mouse and  
135 human in activated MAIT cells (Tables 3,4). Expression of selected cytokines was  
136 confirmed by flow cytometry (Supplementary figures S2, S3). Likewise there was  
137 significant, but more modest, upregulation of LTA (lymphotoxin A) and CSF1 (M-CSF)  
138 in both species. Some features were observed only in one species, notably IL-2 and  
139 TNSF14 (LIGHT) produced by activated human MAIT cells, and Tnfsf11 (TRANCE,  
140 RANKL) by murine MAIT cells. In contrast to activation-induced cytokines, expression  
141 of the anti-apoptotic cytokine IL-15, implicated in the development and maturation of  
142 memory CD8<sup>+</sup> T cells<sup>15</sup>, was restricted to MAIT cells in their resting state: human  
143 unstimulated MAIT cells, or murine MAIT cells at resolution of infection. In mice  
144 resolution of infection was also associated specifically with strong expression of Tnfsf18  
145 (GITRL), confirmed by flow cytometry. Expression of cytokine receptors is shown in  
146 Supplementary tables S6, S7 and of recognised ‘CD markers’ in Supplementary tables S8,  
147 S9.

148 Similar analysis of chemokines showed strong activation-induced upregulation of  
149 a range of chemokines, including XCL1, CCL3 (MIP1 $\alpha$ ), CCL4 (MIP1 $\beta$ ), and CXCL16  
150 common to both species (Supplementary tables S10, S11), and of a common array of  
151 chemokine receptors CCR6, CXCR6, CCR1, CCR2 and CCR5 (Supplementary tables  
152 S12,S13, Supplementary figure S2), underlining marked evolutionary conservation of  
153 MAIT cell function.

## 154 **Pathway analysis of the MAIT cell transcriptome**

155 To analyse the transcriptome at the level of pathways, rather than individual genes, we  
156 looked for upregulation of pathways using the open source, manually curated, peer-  
157 reviewed Reactome database<sup>16</sup>. The main pathways upregulated in human 5-OP-RU  
158 stimulated MAIT cells compared with naïve CD8<sup>+</sup>CD45RA<sup>+</sup> T cells were related to  
159 endoplasmic reticulum stress – the unfolded protein response, and the related pathways  
160 IRE-1- $\alpha$  activation of chaperones and XBP1(S) activation of chaperones – to chemokine  
161 receptor-ligation, and to cholesterol biosynthesis (Figure 2A). When stimulated human  
162 MAIT cells were contrasted directly with unstimulated MAIT cells the activation of  
163 chemokine and cytokine signalling pathways – chemokine receptor-ligation, IL-2  
164 signalling, interleukin receptor SHC signalling – was more apparent, as was human solute  
165 carrier-mediated transmembrane transport (Figure 2B).

166 Perhaps reflective of the different context of activation, and consistent with the very  
167 rapid MAIT cell expansion observed with infection *in vivo*<sup>10</sup>, the murine MAIT cells  
168 activated by acute *L. longbeachae* infection showed very strong activation of cell cycle  
169 pathways as well as signalling by RHO GTPases and chemokine receptor-ligation, with  
170 similar dominance of the cell cycle when MAIT cells activated by acute infection were  
171 contrasted directly with unstimulated MAIT cells after infection resolution (Figure 2C,D).

## 172 **Comparison of MAIT cell transcriptomic profile with other T cell subsets**

173 MAIT cells are a relatively ancient T cell subset, with both innate and adaptive properties,  
174 and are capable of expressing diverse functions depending on the nature of the pathogenic  
175 encounter<sup>10,17</sup>. Therefore we sought next to explore the nature of the murine MAIT cell  
176 transcriptome by comparing it with the transcriptional profiles for a wide range of other



177 cell types reported within the Immunological Genome Project database<sup>18</sup>. Using  
178 hierarchical clustering, whilst the pulmonary naïve CD8<sup>+</sup>CD44<sup>-</sup>CD62<sup>+</sup> T cells clustered  
179 with reference naïve CD8<sup>+</sup> splenic T cells, activated MAIT cells from acute primary  
180 infection or from acute reinfection clustered most closely to invariant NKT cells (Figure  
181 3). By contrast, after resolution of the infection MAIT cells clustered most closely with  
182 unstimulated splenic  $\gamma\delta$  T cells.

### 183 **MAIT cells express a tissue repair transcriptional profile**

184 Our observation of a distinct cytokine signature after infection resolution  
185 suggested that MAIT cells might be capable of performing more diverse functions than a  
186 purely pro-inflammatory response to TCR ligation. As observed already, TCR ligation in  
187 the absence of a TLR-agonist did not induce proliferation of murine MAIT cells. A wide  
188 variety of bacteria, mycobacteria and yeasts, including many commensal organisms<sup>19</sup>  
189 express the riboflavin biosynthetic pathway, and may therefore be a major source of  
190 activating MR1 ligands, constitutively, or during breach of a barrier surface. Indeed MAIT  
191 cells require commensal organisms for their expansion<sup>20</sup>. A class of skin-homing Tc17  
192 cells specific to commensal flora has recently been described, which expresses a ‘tissue  
193 repair’ gene signature and can accelerate repair of an epithelial wound<sup>21</sup>. These cells share  
194 several features with non-classical T cells, including the Type-17 cytokine profile and  
195 restriction by another MHC class 1b antigen presentation molecule H2-M3. Therefore we  
196 asked whether this tissue repair phenotype was a shared transcriptional programme in  
197 MAIT cells. We used gene set enrichment analysis<sup>22</sup> (GSEA) to compare expression of this  
198 set of tissue repair genes<sup>21</sup> (Supplementary table S14) with genes differentially expressed  
199 in MAIT cells. Indeed this gene set was markedly enriched in human MAIT cells after 5-

200 OP-RU stimulation (normalised enrichment score (NES) 1.38, family-wise error rate  
201 (FWER)  $P < 0.01$ , Figure 4A, B, Table 5). Similarly, despite differences in species,  
202 timecourse and method of MAIT cell activation, the same gene set was even more highly  
203 enriched in mice during acute *L. longbeachae* infection (NES 1.38, FWER  $P < 0.01$ , Figure  
204 4C, D, Table 5), with enrichment of ten genes common to both analyses (TNF, CSF2,  
205 HIF1A, FURIN, VEGFB, PTGES2, PDGFB, TGFB1, MMP25).

## 206 **Discussion**

207 Here we have systematically investigated the requirements for TCR-mediated activation of  
208 MAIT cells in mice, and delineated both *ex vivo* in human and *in vivo* in mice the  
209 consequences of this activation at a transcriptomic level. Due to their pro-inflammatory  
210 cytokine profile<sup>8</sup> and specificity for a restricted selection of microbially-derived small  
211 molecules<sup>2,23</sup>, the most immediately apparent function of MAIT cells has hitherto been the  
212 early detection of microbes and initiation of an inflammatory host response<sup>7,11,12,24,25</sup>.  
213 Consistent with previous studies, our data confirm MAIT cells' capacity for a strong, rapid  
214 pro-inflammatory response. However, in contrast to the similarities between activated  
215 MAIT cells and iNKT cells, the close similarity at a transcriptional level of resting murine  
216 MAIT cells to  $\gamma\delta$  T cells and the discovery of a clear transcriptional signature for tissue  
217 repair suggests that MAIT cells potentially have much broader roles in mucosal immunity.

218 The nature of these roles may depend on the context and nature of the cells'  
219 activation. As with iNKT cells<sup>26</sup> MAIT cells may be activated either via TCR recognition  
220 of ligand presented on MR1, or via cytokines alone, in the absence of a TCR signal, as  
221 occurs during respiratory viral infection<sup>17,27,28</sup>. As we have observed previously, in the  
222 absence of inflammatory cytokines TCR-ligation alone is not sufficient to produce MAIT

223 cell proliferation and activation *in vivo*<sup>9</sup>. Rather a second signal is required. *In vitro* in  
224 humans it has been shown that agonists of TLR1, TLR2, and TLR6 can provide this co-  
225 stimulus to drive MAIT cell cytokine secretion<sup>29</sup>. Consistent with, and extending these  
226 previous observations<sup>9</sup>, we observed here that murine MAIT cells proliferated in response  
227 to a different, but similarly restricted, set of TLR agonists: those for TLR3, TLR4, TLR6/2  
228 and TLR9 and, but not for other TLRs tested.

229 As MAIT cells are found at their highest frequencies in the lungs and liver<sup>11,30,31</sup>  
230 and the MR1-axis is highly conserved<sup>5</sup> – implying a strong evolutionary pressure – it could  
231 be expected that potent MAIT cell responses should be elicited by a range of major human  
232 pathogens, and yet to date a strong human clinical phenotype for MAIT cell deficiency has  
233 not been described, and even in animal models the protective effect afforded by MAIT  
234 cells against mortality has been relatively modest in fully immune competent hosts<sup>10,11</sup>,  
235 likely due to multiple layers of immunological redundancy provided by other arms of  
236 innate and adaptive immunity<sup>10</sup>. One explanation might be that a different, more subtle  
237 function of MAIT cells explains Nature’s ongoing requirement for this subset in effective  
238 mucosal immunity.

239 Our data suggest an entirely novel function for MAIT cells in tissue repair. In both  
240 human and murine datasets, activated MAIT cells highly express a shared a gene  
241 expression signature with murine H2-M3 restricted commensal-specific Tc17 cells  
242 recently reported by Linehan *et al*<sup>21</sup>. Using topical skin colonisation with a specific clade  
243 of *S. epidermidis* this group demonstrated that specific commensal-derived *N*-formylated  
244 peptides presented on H2-M3, another class 1b MHC molecule, could induce tissue-  
245 resident Tc17 cells which provided specific capacity to promote tissue repair and

246 remodelling (MMP25, Furin, PDGFB, TGFB1) and angiogenesis (CSF2, VEGFA,  
247 PDGFB)<sup>21</sup>. Healing of skin wounds was shown to be accelerated by colonisation of H2-  
248 M3 sufficient mice with these commensals. A human equivalent of H2-M3 has yet to be  
249 identified, but MAIT cells are abundant at barrier sites, allowing close interactions with  
250 commensal bacteria possessing an intact riboflavin metabolic pathway. Similarly to H2-  
251 M3 restricted CD8<sup>+</sup> T cells, in this position MAIT cells are poised to maintain tissue  
252 homeostasis in the presence of commensals thereby limiting inflammation and associated  
253 tissue injury<sup>32</sup>. These data are consistent with a similar finding of this same tissue repair  
254 signature observed by GSEA analysis of MAIT cells when activated by TCR triggering,  
255 but not observed in the context of cytokine-mediated activation<sup>33</sup>. These findings might  
256 also explain the increased gut permeability observed in *MrI*<sup>-/-</sup> NOD mice compared with  
257 *MrI*<sup>+/-</sup> NOD littermates, which suggested a protective role for MAIT cells for maintaining  
258 gut homeostasis<sup>34</sup>. It was been speculated this might be mediated by IL-17A and IL-22<sup>34</sup>  
259 which are both important in intestinal homeostasis<sup>35,36</sup>, and in the case of IL-22 induction  
260 of protective mucus-producing goblet cells<sup>37</sup>. In our dataset both cytokines were strongly  
261 upregulated in activated murine MAIT cells. Thus during mucosal damage, riboflavin-  
262 synthesising pathogens and commensal organisms might provide the MAIT cell activation  
263 both to induce the necessary inflammatory response to ensure bacterial clearance and also  
264 the signals necessary to accelerate healing of the wound. After successful clearance of  
265 infection, or barrier repair, the subsequent reduction in MR1-Ag presentation would ensure  
266 this signal declined.

267 Commensals might drive the MR1-MAIT cell axis in other ways. MAIT cell  
268 expansion requires exposure to a commensal microbiome<sup>20</sup>. Furthermore, commensal

269 microbes have been implicated in enhancing host immunity against pathogens in the  
270 respiratory tract. In mice a Nod2-mediated IL-17A response to upper respiratory tract  
271 commensals enhanced CSF2 (GM-CSF) to promote bacterial killing and clearance by  
272 alveolar macrophages<sup>38</sup>. The strong upregulation of CSF2 (GM-CSF) we observed  
273 following TCR stimulation in human and murine MAIT cells would be beneficial in  
274 clearance of pathogenic microorganisms which have crossed the mucosal barrier. During  
275 tissue homeostasis commensal-derived MR1 signals might drive lower level, constitutive  
276 expression of GM-CSF needed to maintain alveolar macrophages in a pathogen responsive  
277 state<sup>38</sup>.

278 Another novel, prominent feature of MAIT cell activation in both humans and mice  
279 was the marked expression of the IL-6 family cytokine leukaemia inhibitory factor (LIF).  
280 Consistent with our finding of a MAIT cell tissue-repair signature, LIF has been found to  
281 be protective against epithelial damage in murine models of pneumonia<sup>39</sup>. LIF is  
282 significantly induced during pneumonia and can reduce lung epithelial cell death,  
283 promoting the expression of tissue-protective genes essential to lung regeneration and  
284 repair, and increased mucosal barrier integrity.

285 A unique feature of our transcriptomic dataset is that in a single experiment we  
286 were able to analyse MAIT cells from two different species obtained from two different  
287 tissues, using different contexts of activation, and yet we observed that the transcriptomic  
288 profiles of these MAIT cells were in fact very similar. Thus the distinctive, common  
289 properties of MAIT cells predominate over differences between these cells which might be  
290 observed in different contexts. Again, this underlines a strong conservation of functions  
291 likely driven by a consistent role in mucosal immunology.

292           Given the wide diversity of conventional and non-classical T cells now  
293 recognised<sup>24</sup>, many of which share common transcriptional programmes<sup>40,41</sup> we applied a  
294 comparative approach<sup>42</sup> to analyse the phenotype of MAIT cells, overcoming significant  
295 methodological hurdles to compare our RNA sequencing data directly with older  
296 microarray expression data in the ImmGen dataset. Activated MAIT cells were most  
297 similar to activated invariant iNKT cells, as might be expected from the similarities in  
298 surface markers and functional phenotype<sup>5,24,43</sup>. This is likely related to shared  
299 transcriptional signatures controlled by common transcription factors, not least that which  
300 has been described for promyelocytic leukemia zinc finger (PLZF) which defines a distinct  
301 surface phenotype and functional capacity in CD161<sup>+</sup> NK cells, iNKT cells and MAIT  
302 cells<sup>40</sup>. However it is interesting that in their resting state MAIT cells more closely  
303 resembled splenic  $\gamma\delta$  T cells. Unlike MAIT and iNKT cells, most  $\gamma\delta$  T cells are not  
304 constrained by a specific MHC restriction<sup>44,45</sup>, rather they have different functional profiles  
305 associated with usage of different TCR V gene segments. Depending on the V $\gamma$  subset,  $\gamma\delta$   
306 T cells recognise a diverse range of small microbial metabolites, lipids, self-antigens and  
307 stress-induced proteins, and may display a range of functions associated with variously  
308 with inflammation, immunoregulation, cytotoxicity, antigen presentation<sup>24</sup> and promotion  
309 of tissue repair<sup>46</sup>. In the absence of the TCR/TLR mediated activation, MAIT cells may be  
310 fulfilling a different, perhaps homeostatic function. Indeed, we were able to investigate  
311 what this might be by analysing the transcriptome of MAIT cells in their resting state,  
312 outside the context of inflammation. After resolution of infection, Tnfsf18 (Glucocorticoid-  
313 Induced TNF-Related Ligand, GITRL) is the most strongly upregulated cytokine. The  
314 function of GITRL is context dependent, but under resting, non-inflammatory it can

315 negatively regulate NK cells and maintain or expand regulatory T cells conditions<sup>47</sup>. Other  
316 immunoregulatory cytokines were also upregulated: Tnfsf11 (TRANCE, RANKL) was  
317 identified in a commensal-derived immunoregulatory signature<sup>21</sup>, whilst IL-15 can inhibit  
318 T cell apoptosis to maintain memory T cell survival<sup>48</sup>. Together these data implicate resting  
319 MAIT cells in potentially significant immunoregulatory roles.

320 In summary, our analysis of TCR-activated MAIT cells demonstrates pronounced  
321 conservation of functions and gene expression profiles between human and murine cells,  
322 and suggests that beyond type 17 / type 1 pro-inflammatory responses to invading  
323 microbial pathogens, MAIT cells have the capacity to contribute to immunoregulatory and  
324 tissue repair roles likely to be essential for maintaining the integrity of mucosal barrier  
325 surfaces in health and disease.

326

## 327 **Materials and Methods**

### 328 Animal models

329 C57BL/6 mice were bred and housed in the Biological Research Facility of the Peter  
330 Doherty Institute (Melbourne, Victoria, Australia). Mice aged 6–12 weeks were used in  
331 experiments, after approval by the University of Melbourne Animal Ethics Committee  
332 (1513661 and 1513712).

333 Intranasal (i.n.) inoculation with a stimulatory MR1 ligand (76 pmol 5-OP-RU) or  
334 a non-activating MR1 ligand (76 pmol 6-FP) and TLR agonist (see Table S1) in a total 50  
335 µl volume was performed on isoflurane-anaesthetised mice on day 0. Additional doses of  
336 the relevant MR1 ligand in 50 µl were administered on days 1, 2, and 4. Control mice  
337 received TLR agonists alone, in a total volume of 50 µl. For infection experiments mice

338 were inoculated with  $1-2 \times 10^4$  CFU *Legionella longbeachae* (clinical isolate NSW150) in  
339 50  $\mu$ l PBS.

340 Mice were weighed daily and assessed visually for signs of disease, including  
341 inactivity, ruffled fur, laboured breathing, and huddling behaviour. Animals that had lost  
342  $\geq 15\%$  of their original body weight and/or displayed evidence of pneumonia were  
343 euthanised.

344 Mice were killed by CO<sub>2</sub> asphyxia, the heart perfused with 10 ml cold Roswell Park  
345 Memorial Media-1640 (RPMI, Gibco) and lungs were taken. To prepare single-cell  
346 suspensions lungs were finely chopped with a scalpel blade and treated with 3 mg.ml<sup>-1</sup>  
347 collagenase III (Worthington, Lakewood, NJ), 5  $\mu$ g/ml DNase, and 2% foetal calf serum  
348 in RPMI for 90 min at 37°C with gentle shaking, and, where relevant, brefeldin A  
349 (GolgiPlug™, BD Biosciences, San Diego, CA). Lung cells were then filtered (70  $\mu$ m) and  
350 washed with PBS/2% foetal calf serum. Red blood cells were lysed with hypotonic buffer  
351 TAC (Tris-based amino chloride) for 5 min at 37°C. Approximately  $1.5 \times 10^6$  cells were  
352 filtered (40  $\mu$ m) and used for flow cytometric analysis. To obtain sufficient cells for sorting  
353 naïve CD8<sup>+</sup>CD44<sup>-</sup>CD62L<sup>+</sup> cells from infection-naïve mice lungs from 2-3 mice per sample  
354 were pooled and stained with 0.18  $\mu$ l anti-CD8-PE, then magnetically enriched using anti-  
355 PE beads (Miltenyi) prior to sorting.

356 For analysis of systemic MAIT cell distribution lymphocytes were obtained from  
357 mesenteric lymph nodes by passing through a 70  $\mu$ m strainer. Splenocytes were obtained  
358 by homogenising splenic tissue through a 70  $\mu$ m strainer then performing red cell lysis  
359 prior to staining. Peripheral blood cells were obtained from the inferior vena cava into a  
360 heparinised syringe and underwent surface staining prior to red cell lysis with 1 ml of 10%



361 red cell lysis buffer (BD Bioscience) for 5 minutes at room temperature before washing  
362 twice with FACS buffer. Hepatic lymphocytes were obtained by perfusing the liver with  
363 8-10 ml PBS, passing through a 40 µm strainer, washing once with PBS the resuspending  
364 in 36% Percoll (Sigma) and centrifuging without braking at 800 g for 25 mins at RT over  
365 a 70% Percoll underlay. Cells from the interphase were washed with FACS buffer, red cells  
366 lysed with 1 ml 10% red cell lysis buffer, cells washed twice and stained for flow  
367 cytometry.

368

#### 369 Determination of bacterial counts in infected lungs

370 Bacterial infection was determined for *L. longbeachae* by counting colony-forming units  
371 (CFU) obtained from plating homogenised lungs in duplicate from infected mice (x5 per  
372 group) on buffered charcoal yeast extract agar (BYCE) containing 30 µg/ml streptomycin  
373 and colonies counted after 4 days at 37°C under aerobic conditions. Culture media for other  
374 bacteria are shown in table S2.

375

#### 376 Antibodies flow cytometry and cell sorting

377 Details of flow cytometry antibodies are shown in Supplementary table S15. To block non-  
378 specific staining, cells were incubated with MR1-6-FP tetramer and anti-Fc receptor  
379 (2.4G2) for 15 min at room temperature and then incubated at room temperature with  
380 Ab/tetramer cocktails in PBS/2% foetal calf serum. Dead cells were excluded using 4',6-  
381 diamidino-2-phenylindole (DAPI) for live cell sorting added for 10 mins or by staining for  
382 20 mins in PBS with fixable viability dyes Zombie Yellow (Biolegend, 1:100, 423104) or  
383 Live/Dead EF780 (BD Bioscience, 1:1000, 565388).

384 For live cell sorting on human peripheral blood mononuclear cells (PBMC) 50ml  
385 of heparinised blood were obtained freshly per volunteer, mixed with an equal volume of  
386 phosphate buffered saline (PBS) and layered over an equal volume of Ficoll-Paque (GE  
387 Healthcare, Chicago, IL) and centrifuged at 800 g for 20 mins at room temperature. Cells  
388 were washed twice with PBS, cells counted by trypan blue estimation, then half the cells  
389 were resuspended overnight in RPMI with 10% human serum for overnight rest and the  
390 other half resuspended in flow cytometry buffer comprising PBS with 2% foetal calf serum  
391 and 2 mM EDTA (FACS buffer) for immediate magnetic enrichment and sorting. These  
392 cells were stained with surface antibodies (CD3-PE-CF594, CD8-PerCPCy5.5, CD45RA-  
393 FITC, TCR V $\alpha$ 7.2-APC and FC $\gamma$  block for 15 mins at RT, followed by staining with MR1-  
394 5-OP-RU tetramer-PE for 20 mins at RT. Tetramer positive cells were positively selected  
395 using anti-PE microbeads (10  $\mu$ l per  $10^7$  cells, Miltenyi, Cologne, Germany) according to  
396 the manufacturer's instructions. Cells were sorted immediately into ice cold PBS with 10%  
397 FCS using an FACS Aria III cell sorter (BD Bioscience) selecting live CD3<sup>+</sup>TCR-  
398 V $\alpha$ 7.2<sup>+</sup>MR1-5OP-RU-tetramer<sup>+</sup> MAIT cells from the positive fraction and live  
399 CD3<sup>+</sup>CD8<sup>+</sup>CD45RA<sup>+</sup>MR1-Tetramer<sup>-</sup> cells from the negative fraction. The following day  
400 the remaining cells were stimulated for 6 h with 10 nM 5-OP-RU then magnetically  
401 enriched using MR1-5-OP-RU-tetramer-PE and anti-PE microbeads, and live CD3<sup>+</sup>TCR-  
402 V $\alpha$ 7.2<sup>+</sup>MR1-5-OP-RU-tetramer<sup>+</sup> MAIT cells sorted in the same manner. Purity was  
403 checked and with an average of 98%. Immediately after sorting cells were centrifuged at  
404 400 g for 5 mins then resuspended in 100  $\mu$ L of RNA lysis buffer (Agilent Ltd, UK) with  
405 0.7  $\mu$ L  $\beta$ -mercaptoethanol and stored at -80°C.

406 For live cell sorting of murine T cells, CD8 cells were magnetically enriched using  
407 anti-CD8-PE and anti-PE microbeads and live CD8<sup>+</sup>CD44<sup>-</sup>CD62L<sup>+</sup> cells from uninfected  
408 mice, or live CD3<sup>+</sup>CD19<sup>-</sup>CD45.2<sup>+</sup>TCRβ<sup>+</sup>MR1-5-OP-RU-tetramer<sup>+</sup> MAIT cells from  
409 previously infected mice were sorted as above.

410 For intracellular staining, cells were fixed with 1% paraformaldehyde prior to  
411 analysis on LSRII or LSR Fortessa or Canto II (BD Biosciences) flow cytometers. For  
412 intracellular cytokine staining Golgi plug (BD Biosciences) was used during all processing  
413 steps. Cells stimulated with PMA (phorbol 12-myristate 13-acetate;)/ionomycin (20 ng ml<sup>-1</sup>,  
414 1 μg ml<sup>-1</sup>, respectively) for 3 h at 37°C were included as positive controls. Surface  
415 staining was performed at 37°C, and cells were stained for intracellular cytokines using the  
416 BD Fixation/Permeabilization Kit (BD, Franklin Lakes, NJ) or transcription factors using  
417 the transcription buffer staining set (eBioscience) according to the manufacturers'  
418 instructions.

419 For validation of key targets identified by RNA sequencing flow cytometry was  
420 performed on cryopreserved human PBMC from additional healthy human donors.  
421 Samples were defrosted into pre-warmed RPMI with 10% human serum, stained with anti-  
422 TCR-Vα7.2-PE or anti-TCR-Vα7.2-PE and magnetically enriched using anti-PE or anti-  
423 APC microbeads. 200,000 positively-selected TCR-Vα7.2<sup>+</sup> cells or the negative fraction  
424 (for naïve CD8<sup>+</sup>45RA<sup>+</sup> cells) were co-cultured for 5 hours in the presence of brefeldin A  
425 with 100,000 class I reduced (C1R) antigen presenting cells (APCs) which had been  
426 previously pulsed for 2 hours with 10 nM 5-OP-RU, or with naïve C1R cells (unstimulated  
427 control), or with PMA / ionomycin (20 ng ml<sup>-1</sup>, 1 μg ml<sup>-1</sup>, respectively), or without any  
428 stimulation. Cells were then analysed by surface and intracellular cytokine staining as

429 above. For validation of murine targets cells were isolated from uninfected mice or mice  
430 which had undergone intranasal infection 7 days prior (acute) or 12 weeks prior (resolution)  
431 or reinfection 7 days prior, and cytometrically analysed as described above.

432

### 433 RNA sequencing

434 Cells were lysed in Agilent lysis buffer (Agilent Ltd., UK) containing 100 mM  $\beta$ -  
435 mercaptoethanol and passed through a QIAshredder device (Qiagen, Valencia, US),  
436 then RNA extracted using the Absolutely RNA Nanoprep Kit according to the  
437 manufacturer's instructions, including using of DNase I. RNA libraries were prepared at  
438 the Melbourne Translational Genomics Platform, Department of Pathology (The  
439 University of Melbourne). Briefly, RNA quality and quantity were assessed using the  
440 Bioanalyzer 2100 RNA pico kit (Agilent technologies). The input total RNA was  
441 normalized to 250 pg per sample and median RIN was 9.7 (range 5.7-10.0). RNA was  
442 reverse transcribed and cDNA amplified by *in vitro* transcription with the SMART-Seq v4  
443 Ultra Low Input RNA Kit for Sequencing (Clontech). First strand cDNA synthesis and  
444 tailing by reverse transcription was performed using Clontech's proprietary SMART  
445 (Switching Mechanism at 5' End of RNA Template) technology. Following first strand  
446 synthesis, cDNA was amplified 12 cycles by LD PCR using blocked PCR primers.  
447 Amplified cDNA was purified using AMPure XP prior to QC using the bioanalyser 2100  
448 HS DNA kit (Agilent technologies). Library preparation of purified amplified cDNA was  
449 performed using Nextera XT library preparation (Illumina, AUS). Following QC, 150 pg  
450 of cDNA was tagmented (simultaneously fragmented with adaptors inserted) using Nextera  
451 transposons. Molecular barcodes were incorporated during 12 cycles of amplification

452 followed by purification using AMPure XP. The libraries passed a quality checkpoint  
453 (Qubit and Bioanalyser HS DNA) prior to normalization and pooling before loading onto  
454 the HiSeq 2500 (Illumina, AUS) for paired end sequencing.

455

#### 456 Quality control and bioinformatics analysis of RNA sequencing data

457 RNA-seq reads were aligned to reference genome sequences using STAR<sup>49</sup> aligner  
458 software. Mapped reads were assigned to genomic features using *Rsubread*<sup>50</sup> R package<sup>51</sup>.

459 Genes that were differentially expressed (>2 fold, P<0.01, FDR<0.05) between  
460 conditions and their normalised expression values, were generated with *EdgeR* R  
461 package<sup>52</sup>, Partek® Flow®, an online analysis platform for Next Generation Sequencing  
462 data (<http://www.partek.com/partek-flow/>). Pathway enrichment analysis using the  
463 Reactome platform<sup>16</sup> was performed using *ReactomePA*<sup>53</sup> R package. Gene count data  
464 transform to log2-counts per million (logCPM) was performed using *voom* function in  
465 *limma*<sup>54</sup> R package. Gene set enrichment analysis (GSEA) using *voom* transformed count  
466 data was performed using GSEA version 3.0<sup>55</sup>, comparing gene expression data as a whole  
467 with the reference gene list obtained from the publication by Linehan et al.<sup>21</sup>

468 RNA-seq data (logCPM) and ImmGen microarray data were integrated using a  
469 common set of *Entrez*<sup>56</sup> annotated genes; batch effect removal was performed using  
470 *ComBat* algorithm in *sva*<sup>57</sup> R package. Hierarchical clustering analysis of transcription  
471 profiles was conducted in R employing highly variable genes (IQR >0.75<sup>58</sup>) and Euclidian  
472 distance.

473

#### 474 Standard statistical analysis

475 Statistical tests were performed using the Prism GraphPad software (version 7.0 La Jolla,  
476 CA). Comparisons between groups were performed using Student's t-tests or Mann-  
477 Whitney tests as appropriate unless otherwise stated. Flow cytometric data analysis was  
478 performed with FlowJo10 software (Ashland, OR).

479

480 Reagents

481 Human peripheral blood mononuclear cells (PBMC) were obtained from the Australian  
482 Red Cross Blood Service (ARCBS) (University of Melbourne Human Research Ethics  
483 Committee 1239046.2). Healthy human lung explant tissue was obtained via the Alfred  
484 Lung Biobank program and ARCBS from organs not suitable for donation (Blood Service  
485 HREC 2014#14 and University of Melbourne Human Research Ethics Committee  
486 1545566.1).

487

488 Compounds, immunogens and tetramers

489 5-OP-RU was prepared as described previously<sup>6</sup>. CpG1668 (Sequence:  
490 T\*C\*C\*A\*T\*G\*A\*C\*G\*T\*T\*C\*C\*T\*G\*A\*T\*G\*C\*T (\*phosphorothioate linkage)  
491 nonmethylated cytosine-guanosine oligonucleotides was purchased from Geneworks  
492 (Thebarton, Australia) and Pam2Cys was chemically synthesised and functionally verified  
493 in house. Other toll like receptor ligands are detailed in Supplementary table S1. Murine  
494 and human MR1 and  $\beta$ 2-Microglobulin genes were expressed in *Escherichia coli* inclusion  
495 bodies, refolded, and purified as described previously<sup>59</sup>. MR1-5-OP-RU tetramers were  
496 generated as described previously<sup>2</sup>.

497

498 Bacterial strains

499 Cultures of *Legionella longbeachae* NSW150 were grown at 37°C in buffered yeast extract  
500 (BYE) broth supplemented with 30-50  $\mu$ g/ml streptomycin for 16 hours to log-phase  
501 (OD600 0.2-0.6) with shaking at 180 rpm. For the infecting inoculum, bacteria were re-

502 inoculated in pre-warmed medium for a further 2–4 h culture ( $OD_{600}$  0.2–0.6) with the  
503 estimation that 1  $OD_{600}=5 \times 10^8$ /ml, sufficient bacteria were washed and diluted in  
504 phosphate buffered saline (PBS) with 2% BVE for i.n. delivery to mice. A sample of  
505 inoculum was plated onto (BYCE) with streptomycin for verification of bacterial  
506 concentration by counting colony-forming units.

## 507 References:

- 508 1. Kjer-Nielsen, L., *et al.* MR1 presents microbial vitamin B metabolites to MAIT  
509 cells. *Nature* **491**, 717-723 (2012).
- 510 2. Corbett, A.J., *et al.* T-cell activation by transitory neo-antigens derived from  
511 distinct microbial pathways. *Nature* **509**, 361-365 (2014).
- 512 3. Eckle, S.B., *et al.* Recognition of Vitamin B Precursors and Byproducts by  
513 Mucosal Associated Invariant T Cells. *J Biol Chem* **290**, 30204-30211 (2015).
- 514 4. Tilloy, F., *et al.* An invariant T cell receptor alpha chain defines a novel TAP-  
515 independent major histocompatibility complex class Ib-restricted alpha/beta T cell  
516 subpopulation in mammals. *J Exp Med* **189**, 1907-1921 (1999).
- 517 5. Porcelli, S., Yockey, C.E., Brenner, M.B. & Balk, S.P. Analysis of T cell antigen  
518 receptor (TCR) expression by human peripheral blood CD4-8- alpha/beta T cells  
519 demonstrates preferential use of several V beta genes and an invariant TCR alpha  
520 chain. *J Exp Med* **178**, 1-16 (1993).
- 521 6. Mak, J.Y., *et al.* Stabilizing short-lived Schiff base derivatives of 5-aminouracils  
522 that activate mucosal-associated invariant T cells. *Nature communications* **8**,  
523 14599 (2017).
- 524 7. Le Bourhis, L., *et al.* Antimicrobial activity of mucosal-associated invariant T  
525 cells. *Nat Immunol* **11**, 701-708 (2010).
- 526 8. Dusseaux, M., *et al.* Human MAIT cells are xenobiotic-resistant, tissue-targeted,  
527 CD161hi IL-17-secreting T cells. *Blood* **117**, 1250-1259 (2011).
- 528 9. Chen, Z., *et al.* Mucosal-associated invariant T-cell activation and accumulation  
529 after in vivo infection depends on microbial riboflavin synthesis and co-  
530 stimulatory signals. *Mucosal immunology* **10**, 58-68 (2017).
- 531 10. Wang, H., *et al.* MAIT cells protect against pulmonary *Legionella longbeachae*  
532 infection. *Nature communications* **9**, 3350 (2018).
- 533 11. Meierovics, A., Yankelevich, W.J. & Cowley, S.C. MAIT cells are critical for  
534 optimal mucosal immune responses during in vivo pulmonary bacterial infection.  
535 *Proc Natl Acad Sci U S A* **110**, E3119-3128 (2013).
- 536 12. Meierovics, A.I. & Cowley, S.C. MAIT cells promote inflammatory monocyte  
537 differentiation into dendritic cells during pulmonary intracellular infection. *J Exp*  
538 *Med* **213**, 2793-2809 (2016).
- 539 13. Reantragoon, R., *et al.* Antigen-loaded MR1 tetramers define T cell receptor  
540 heterogeneity in mucosal-associated invariant T cells. *J Exp Med* **210**, 2305-2320  
541 (2013).
- 542 14. Lepore, M., *et al.* Parallel T-cell cloning and deep sequencing of human MAIT  
543 cells reveal stable oligoclonal TCRbeta repertoire. *Nature communications* **5**,  
544 3866 (2014).
- 545 15. Jabri, B. & Abadie, V. IL-15 functions as a danger signal to regulate tissue-  
546 resident T cells and tissue destruction. *Nat Rev Immunol* **15**, 771-783 (2015).
- 547 16. Fabregat, A., *et al.* The Reactome Pathway Knowledgebase. *Nucleic acids*  
548 *research* **46**, D649-D655 (2018).
- 549 17. van Wilgenburg, B., *et al.* MAIT cells contribute to protection against lethal  
550 influenza infection *in vivo*. *Nature communications* **9**(2018).



- 551 18. Heng, T.S., Painter, M.W. & Immunological Genome Project, C. The  
552 Immunological Genome Project: networks of gene expression in immune cells.  
553 *Nat Immunol* **9**, 1091-1094 (2008).
- 554 19. Kanehisa, M. & Goto, S. KEGG: Kyoto encyclopedia of genes and genomes.  
555 *Nucleic acids research* **28**, 27-30 (2000).
- 556 20. Treiner, E., *et al.* Selection of evolutionarily conserved mucosal-associated  
557 invariant T cells by MR1. *Nature* **422**, 164-169 (2003).
- 558 21. Linehan, J.L., *et al.* Non-classical Immunity Controls Microbiota Impact on Skin  
559 Immunity and Tissue Repair. *Cell* **172**, 784-796 e718 (2018).
- 560 22. Mootha, V.K., *et al.* PGC-1alpha-responsive genes involved in oxidative  
561 phosphorylation are coordinately downregulated in human diabetes. *Nat Genet*  
562 **34**, 267-273 (2003).
- 563 23. Kjer-Nielsen, L., *et al.* MR1 presents microbial vitamin B metabolites to MAIT  
564 cells. *Nature* **491**, 717-723 (2012).
- 565 24. Godfrey, D.I., Uldrich, A.P., McCluskey, J., Rossjohn, J. & Moody, D.B. The  
566 burgeoning family of unconventional T cells. *Nat Immunol* **16**, 1114-1123 (2015).
- 567 25. Le Bourhis, L., *et al.* MAIT Cells Detect and Efficiently Lyse Bacterially-Infected  
568 Epithelial Cells. *PLoS Pathog* **9**, e1003681 (2013).
- 569 26. Holzapfel, K.L., Tyznik, A.J., Kronenberg, M. & Hogquist, K.A. Antigen-  
570 dependent versus -independent activation of invariant NKT cells during infection.  
571 *J Immunol* **192**, 5490-5498 (2014).
- 572 27. van Wilgenburg, B., *et al.* MAIT cells are activated during human viral infections.  
573 *Nature communications* **7**, 11653 (2016).
- 574 28. Loh, L., *et al.* Human mucosal-associated invariant T cells contribute to antiviral  
575 influenza immunity via IL-18-dependent activation. *Proc Natl Acad Sci U S A*  
576 **113**, 10133-10138 (2016).
- 577 29. Ussher, J.E., *et al.* TLR signalling in human antigen-presenting cells regulates  
578 MR1-dependent activation of MAIT cells. *Eur J Immunol* **46**, 1600-1614 (2016).
- 579 30. Rahimpour, A., *et al.* Identification of phenotypically and functionally  
580 heterogeneous mouse mucosal-associated invariant T cells using MR1 tetramers.  
581 *J Exp Med* **212**, 1095-1108 (2015).
- 582 31. Greene, J.M., *et al.* MR1-restricted mucosal-associated invariant T (MAIT) cells  
583 respond to mycobacterial vaccination and infection in nonhuman primates.  
584 *Mucosal immunology* **10**, 802-813 (2017).
- 585 32. Klenerman, P. & Ogg, G. Killer T cells show their kinder side. *Nature* **555**, 594-  
586 595 (2018).
- 587 33. Leng, T., *et al.* TCR and inflammatory signals tune human MAIT cells to exert  
588 specific tissue repair and effector functions. *bioRxiv* (2018).
- 589 34. Rouxel, O., *et al.* Cytotoxic and regulatory roles of mucosal-associated invariant  
590 T cells in type 1 diabetes. *Nat Immunol* **18**, 1321-1331 (2017).
- 591 35. Lee, J.S., *et al.* Interleukin-23-Independent IL-17 Production Regulates Intestinal  
592 Epithelial Permeability. *Immunity* **43**, 727-738 (2015).
- 593 36. Dudakov, J.A., Hanash, A.M. & van den Brink, M.R. Interleukin-22:  
594 immunobiology and pathology. *Annu Rev Immunol* **33**, 747-785 (2015).
- 595 37. Sugimoto, K., *et al.* IL-22 ameliorates intestinal inflammation in a mouse model  
596 of ulcerative colitis. *J Clin Invest* **118**, 534-544 (2008).

- 597 38. Brown, R.L., Sequeira, R.P. & Clarke, T.B. The microbiota protects against  
598 respiratory infection via GM-CSF signaling. *Nature communications* **8**, 1512  
599 (2017).
- 600 39. Quinton, L.J., *et al.* Leukemia inhibitory factor signaling is required for lung  
601 protection during pneumonia. *J Immunol* **188**, 6300-6308 (2012).
- 602 40. Kurioka, A., *et al.* CD161 Defines a Functionally Distinct Subset of Pro-  
603 Inflammatory Natural Killer Cells. *Frontiers in immunology* **9**, 486 (2018).
- 604 41. Cohen, N.R., *et al.* Shared and distinct transcriptional programs underlie the  
605 hybrid nature of iNKT cells. *Nat Immunol* **14**, 90-99 (2013).
- 606 42. Lee, Y.J., *et al.* Lineage-Specific Effector Signatures of Invariant NKT Cells Are  
607 Shared amongst gammadelta T, Innate Lymphoid, and Th Cells. *J Immunol* **197**,  
608 1460-1470 (2016).
- 609 43. Eckle, S.B., *et al.* A molecular basis underpinning the T cell receptor  
610 heterogeneity of mucosal-associated invariant T cells. *J Exp Med* **211**, 1585-1600  
611 (2014).
- 612 44. Chien, Y.H., Meyer, C. & Bonneville, M. gammadelta T cells: first line of  
613 defense and beyond. *Annu Rev Immunol* **32**, 121-155 (2014).
- 614 45. Vantourout, P. & Hayday, A. Six-of-the-best: unique contributions of gammadelta  
615 T cells to immunology. *Nat Rev Immunol* **13**, 88-100 (2013).
- 616 46. Havran, W.L. & Jameson, J.M. Epidermal T cells and wound healing. *J Immunol*  
617 **184**, 5423-5428 (2010).
- 618 47. Clouthier, D.L. & Watts, T.H. Cell-specific and context-dependent effects of  
619 GITR in cancer, autoimmunity, and infection. *Cytokine & growth factor reviews*  
620 **25**, 91-106 (2014).
- 621 48. Malamut, G., *et al.* IL-15 triggers an antiapoptotic pathway in human  
622 intraepithelial lymphocytes that is a potential new target in celiac disease-  
623 associated inflammation and lymphomagenesis. *J Clin Invest* **120**, 2131-2143  
624 (2010).
- 625 49. Dobin, A., *et al.* STAR: ultrafast universal RNA-seq aligner. *Bioinformatics* **29**,  
626 15-21 (2013).
- 627 50. Liao, Y., Smyth, G.K. & Shi, W. The Subread aligner: fast, accurate and scalable  
628 read mapping by seed-and-vote. *Nucleic acids research* **41**, e108 (2013).
- 629 51. Team, R.C. R: A language and environment for statistical computing. . (R  
630 Foundation for Statistical Computing, Vienna, Austria, 2014).
- 631 52. Robinson, M.D., McCarthy, D.J. & Smyth, G.K. edgeR: a Bioconductor package  
632 for differential expression analysis of digital gene expression data. *Bioinformatics*  
633 **26**, 139-140 (2010).
- 634 53. Yu, G. & He, Q.Y. ReactomePA: an R/Bioconductor package for reactome  
635 pathway analysis and visualization. *Mol Biosyst* **12**, 477-479 (2016).
- 636 54. G, S., *et al.* limma: Linear Models for Microarray Data. (2016).
- 637 55. Subramanian, A., *et al.* Gene set enrichment analysis: a knowledge-based  
638 approach for interpreting genome-wide expression profiles. *Proc Natl Acad Sci U*  
639 *S A* **102**, 15545-15550 (2005).
- 640 56. Maglott, D., Ostell, J., Pruitt, K.D. & Tatusova, T. Entrez Gene: gene-centered  
641 information at NCBI. *Nucleic acids research* **39**, D52-57 (2011).

- 642 57. Leek, J.T., Johnson, W.E., Parker, H.S., Jaffe, A.E. & Storey, J.D. The sva  
643 package for removing batch effects and other unwanted variation in high-  
644 throughput experiments. *Bioinformatics* **28**, 882-883 (2012).
- 645 58. Gentleman, R.C., *et al.* Bioconductor: open software development for  
646 computational biology and bioinformatics. *Genome Biol* **5**, R80 (2004).
- 647 59. Patel, O., *et al.* Recognition of vitamin B metabolites by mucosal-associated  
648 invariant T cells. *Nature communications* **4**, 2142 (2013).
- 649
- 650

## 651 **Acknowledgments**

652 This work was funded by grants to T.S.C.H. from the Wellcome Trust (104553/z/14/z,  
653 211050/Z/18/z). The research was supported by the National Institute for Health Research  
654 (NIHR) Oxford Biomedical Research Centre (BRC). The views expressed are those of the  
655 authors and not necessarily those of the NHS, the NIHR or the Department of Health. The  
656 work was also supported by the National Health and Medical Research Council of Australia  
657 (NHMRC) Program Grants 1113293, 1071916, 1016629 and 606788, and Project Grant  
658 1120467. A.J.C. is supported by an ARC Future Fellowship. S.B.G.E. is supported by an  
659 ARC DECRA Fellowship. P.K. was supported by an NIHR Senior Fellowship, Oxford  
660 Martin School (PK) and the Wellcome Trust (WT109965MA). We are grateful to Dr  
661 Brendan Russ and Linda Wakim for assistance and suggestions for experimental design;  
662 Dr Ama Essilfie, Prof Richard Strugnell, Frances Oppodisam, Jennifer Davies, Prof Roy  
663 Robbins-Browne, Prof Kenneth Beagley and Hayley Newton for bacterial strains; Prof  
664 David Jackson for Pam2Cys; Dr Jeffrey Mak for MR1 ligands; Dr Vanta Jameson, Mr Josh  
665 Kie at the Flow Cytometry Facilities at the Melbourne Brain Centre and the Peter Doherty  
666 Institute; and to Kym Pham and Karey Cheong at the Melbourne Translational Genomic  
667 Platform.

## 668 **Author contributions**

669 TSCH, TLP, LK, SBG, BSM, BR, KP, KC performed the experiments. TSCH, MO, EM,  
670 AK, MJ analysed the data. TSCH, JM, ZC, AC, ST, PK designed the experiments and  
671 managed the study. TSCH, MJ, AC, ZC, JM, PK conceived the work and wrote the  
672 manuscript which was revised and approved by all authors.

673

674 **Competing Financial Interests**

675 Z.C., J.McC., and A.C. are inventors on patents describing MR1 tetramers and MR1

676 ligands. The other authors declared no conflict of interest.

677

678 **Materials and Correspondence**

679 Correspondence and material requests should be addressed to TSC Hinks

680 (timothy.hinks@ndm.ox.ac.uk).

681

682

## 683 **Figures**

684

### 685 **Figure 1. Costimulatory requirements for MAIT cell activation *in vivo***

686 (A) Representative flow-cytometry plots showing MAIT cell percentage among TCR $\beta$ <sup>+</sup>  
687 lymphocytes in the lungs of C57BL/6 mice with or without prior stimulation with intranasal  
688 CpG and 5-OP-RU. Relative (B) and absolute (C) numbers of MR1-5-OP-RU tetramer<sup>+</sup>  
689 MAIT cells in the lungs of C57BL/6 mice 7 days after intranasal exposure to specific TLR  
690 agonists either alone, or in combination with 76 pmol 6-FP, or with 76 pmol 5-OP-RU.  
691 Control mice received nothing (n=4, naïve) or CpG with 5-OP-RU (n=3). Experiments  
692 used n=5 (5-OP-RU treated), n=3 (6-FP treated) or n=2 (TLR agonist alone) mice per  
693 group. The experiment was subsequently repeated with similar results. Statistical tests:  
694 unpaired t tests, comparing TLR + 5-OP-RU with naïve control (n=4), on untransformed  
695 (B) or log-transformed (C) data, with Bonferroni corrections \* P<0.05, \*\*\* P<0.001.

696

### 697 **Figure 2. Reactome pathway analysis of activated MAIT cells**

698 Pathway analysis of human and murine activated MAIT cell transcriptomes. Human  
699 peripheral blood 5-OP-RU-stimulated MR1-5-OP-RU-tetramer<sup>+</sup> MAIT cells compared  
700 with (A) naïve CD8<sup>+</sup>CD45RA<sup>+</sup> cells or (B) unstimulated MAIT cells. Murine pulmonary  
701 MR1-5-OP-RU-tetramer<sup>+</sup> MAIT cells day 7 post-infection with *Legionella* were compared  
702 with (C) naïve CD8<sup>+</sup>CD44<sup>-</sup>CD62L<sup>+</sup> T cells from uninfected mice or (D) MR1-tetramer<sup>+</sup>  
703 MAIT cells from mice 12 weeks post infection with *Legionella*. Plots show the extent to  
704 which named pathways from the curated Reactome database are upregulated. Colour

705 intensity represents statistical significance of the upregulation, dot size represents the  
706 number of genes upregulated in the pathway, x axis represents the proportion of all  
707 differentially expressed genes included in the pathway ('gene ratio'). Pathways were  
708 selected using a significance threshold of a log fold change > 2 and P <0.01.

709 **Figure 3. Comparison of murine MAIT cell transcriptomes with other**  
710 **cells in Immunological Genome Project dataset**

711 Hierarchical clustering was used to compare transcriptomes of murine pulmonary MAIT  
712 cells or naïve CD8<sup>+</sup>CD44<sup>-</sup>CD62L<sup>+</sup> cells with eighty-eight other cell types deposited in the  
713 Immunological Genome Project (ImmGen) database. Figure shows a dendrogram (left),  
714 ImmGen identifiers (middle) and the full name of each cell type (right). ImmGen samples  
715 are identified in white lettering. Samples from the current study are identified in black  
716 lettering, with extended lozenges. Cell types are colour-coded: invariant natural killer T  
717 cells (iNKT, orange), natural killer (NK) cells (brown),  $\gamma\delta$  T cells (light green), innate  
718 lymphoid cells (ILC, dark green), conventional CD8 T cells (blue), MAIT cells (purple).  
719 CD, clonal designation; NCR, NK cell receptor; Teff, effector T cell; Tmem, memory T  
720 cell.

721 **Figure 4. Gene set enrichment analysis for tissue repair gene signature in**  
722 **human and murine MAIT cells**

723 Gene set enrichment analysis (GSEA) was used to determine potential enrichment of a  
724 tissue repair signature<sup>21</sup> in gene expression profiles from human (A,B) and murine (C,D)  
725 MAIT cells. (A) GSEA summary plots for 5-OP-RU-stimulated human peripheral blood  
726 MAIT cells compared with unstimulated MAIT cells. The gene set is highly enriched:

727 enrichment score (ES) = 0.62, normalised enrichment score (NES) = 1.38, nominal p value  
728 <0.01, family-wise error rate (FWER) p value <0.01. **(B)** Heat map of expression of leading  
729 edge subset genes within the gene set (red, highest expression, blue, lowest). **(C)** GSEA  
730 summary plots for murine pulmonary MAIT cells 7 days post i.n. *L. longbeachae* infection,  
731 compared with MAIT cells 12 weeks post infection. The gene set is highly enriched:  
732 enrichment score (ES) = 0.85, normalised enrichment score (NES) = 1.23, nominal p value  
733 <0.01, family-wise error rate (FWER) p value <0.01. **(D)** Heat map of expression of leading  
734 edge subset genes within the gene set (red, highest expression, blue, lowest).

735 **Supplementary figure S1. Tissue distribution of MAIT cells during**  
736 **infection *in vivo***

737 Relative frequencies of MR1-5-OP-RU tetramer<sup>+</sup> MAIT cells as a proportion of total live  
738 TCRβ<sup>+</sup> T cells in the peripheral blood, mesenteric lymph node (L.N.), spleen, liver and  
739 lungs of C57BL/6 mice before, or after intranasal infection with 1x10<sup>4</sup> CFU *L.*  
740 *longbeachae*. Mice were sacrificed before (‘uninfected’), or 7 days after infection (‘acute’),  
741 or at least 12 weeks post infection (‘resolution’) or 7 days after a second intranasal infection  
742 with 2x10<sup>4</sup> CFU *L. longbeachae* in mice which had recovered from infection 12 weeks  
743 previously (‘reinfection’). Graph shows combined data from experiments using 3-5 mice  
744 per group and performed one-three times.



745 **Supplementary figure S2. Cytometric validation of key differentially**  
746 **expressed genes (human)**

747 (A) Representative flow-cytometry plots showing surface expression of the chemokine  
748 receptors CCR5, CCR7, CCR2, CCR1, CXCR6, CXCR4, CCR6, CXCR3, and intracellular  
749 expression of the cytokines IL-10, IL-17F and LIF. Histograms compare staining of  
750 CD8<sup>+</sup>CD45RA<sup>+</sup> cells (black, dotted) with unstimulated MAIT cells (blue) or MAIT cells  
751 after 6 h stimulation with 10 nM 5-OP-RU (red). (B) Representative flow-cytometry plots  
752 showing expression of the cytokines IL-17A, GM-CSF, IFN- $\gamma$  and IL-10, by intracellular  
753 cytokine staining. Histograms compare staining of MR1-5-OP-RU tetramer<sup>+</sup> MAIT cells  
754 after 6 h stimulation with 10 nM 5-OP-RU in the presence of brefeldin A (right) with  
755 unstimulated cells (middle) and tetramer-negative, CD8<sup>+</sup>CD45RA<sup>+</sup> naïve T cells (left).  
756 Figures in brackets represent percentage of MAIT cells (top / middle) or of CD8<sup>+</sup>CD45RA<sup>+</sup>  
757 T cells (bottom) expressing the cytokine. Results are representative of three independent  
758 donors.

759 **Supplementary figure S3. Cytometric validation of key differentially**  
760 **expressed genes (murine)**

761 Representative flow-cytometry plots showing expression of the cytokines IL-17A, TNF,  
762 IL-10, TRANCE (TNFSF11), GM-CSF, IL-17F and GITRL (TNFSF18) by intracellular  
763 cytokine staining on murine pulmonary T cells. Histograms compare staining of CD44<sup>+</sup>  
764 CD62L<sup>+</sup> T cells from uninfected mice (left) with MR1-5-OP-RU tetramer<sup>+</sup> MAIT cells  
765 either 7 days ('acute', middle left) or 12 weeks ('resolution', middle right) after infection  
766 with 1 x10<sup>4</sup> CFU intranasal *L. longbeachae*, or 7 days after reinfection with 2 x10<sup>4</sup> CFU

767 i.n. *L. longbeachae* in mice previously infected 12 weeks prior with  $10^4$  CFU i.n. *L.*  
768 *longbeachae* ('reinfection', right). Cells were incubated for 4 h in the presence of brefeldin  
769 A without (A, *ex vivo*) or with (B, stimulated) PMA and ionomycin. Figures in brackets  
770 represent percentage of CD44<sup>-</sup>CD62L<sup>+</sup> T cells (left, lower quadrants) or MR1-tetramer<sup>+</sup>  
771 MAIT cells (middle and right, upper quadrants), or MR1-tetramer<sup>-</sup> conventional T cells  
772 (middle and right, lower quadrants) expressing the cytokine. Results are representative of  
773 three independent replicates performed on two separate days.

#### 774 **Supplementary figure S4. Cytometric gating strategy (human)**

775 Human peripheral blood lymphocytes were identified, and doublets excluded, using  
776 forward and side scatter characteristics. Dead cells were excluded using Zombie Yellow  
777 viability stain, then populations were gated on CD3<sup>+</sup> cells, then on either MR1-5-OP-RU  
778 tetramer conjugated to PE or BV421 for MAIT cells, or on CD8 and CD45RA to identify  
779 naïve CD8<sup>+</sup>CD45RA<sup>+</sup> cells. Histograms compare staining of CD8<sup>+</sup>CD45RA<sup>+</sup> cells (black)  
780 with unstimulated MAIT cells (blue) or MAIT cells after 6 h stimulation with 10 nM 5-  
781 OP-RU (red). For intracellular cytokines, where basal cytokine secretion was minimal,  
782 gates were set on the unstimulated MAIT cell sample.

#### 783 **Supplementary figure S5. Cytometric gating strategy (murine)**

784 Pulmonary lymphocytes were identified, and doublets excluded, using forward and side  
785 scatter characteristics. Dead cells were excluded using Zombie Yellow viability stain, then  
786 populations were gated on CD19<sup>-</sup>CD45.2<sup>+</sup> cells, then TCRβ<sup>+</sup> cells and finally MR1-5-OP-  
787 RU tetramer<sup>+</sup> MAIT cells, or CD44<sup>-</sup>CD62L<sup>+</sup> T cells.

788 **Tables**

789 **Table 1. Definitions of transcriptomic samples**

| Species | Condition                               | Cell type              | Cytometric definition                                                                                              | Samples (n) |
|---------|-----------------------------------------|------------------------|--------------------------------------------------------------------------------------------------------------------|-------------|
| Human   | Unstimulated                            | Naïve cytotoxic T cell | Live CD3 <sup>+</sup> CD8 <sup>+</sup> 45RA <sup>+</sup>                                                           | 3           |
| Human   | Unstimulated                            | MAIT cell              | Live CD3 <sup>+</sup> TCR-V $\alpha$ 7.2 <sup>+</sup> MR1-5OP-RU-tetramer <sup>+</sup>                             | 3           |
| Human   | Stimulated (5-OP-RU)                    | MAIT cell              | Live CD3 <sup>+</sup> TCR-V $\alpha$ 7.2 <sup>+</sup> MR1-5OP-RU-tetramer <sup>+</sup>                             | 3           |
| Murine  | Uninfected                              | Naïve cytotoxic T cell | Live CD3 <sup>+</sup> 45.2 <sup>+</sup> 19 <sup>-</sup> TCR $\beta$ <sup>+</sup> 44 <sup>-</sup> 62L <sup>+</sup>  | 3           |
| Murine  | Acute infection (7 days post infection) | MAIT cell              | Live CD3 <sup>+</sup> 45.2 <sup>+</sup> 19 <sup>-</sup> TCR $\beta$ <sup>+</sup> MR1-5-OP-RU-tetramer <sup>+</sup> | 3           |
| Murine  | Resolution (12 w post infection)        | MAIT cell              | Live CD3 <sup>+</sup> 45.2 <sup>+</sup> 19 <sup>-</sup> TCR $\beta$ <sup>+</sup> MR1-5-OP-RU-tetramer <sup>+</sup> | 3           |
| Murine  | Reinfection (7 days post reinfection)   | MAIT cell              | Live CD3 <sup>+</sup> 45.2 <sup>+</sup> 19 <sup>-</sup> TCR $\beta$ <sup>+</sup> MR1-5-OP-RU-tetramer <sup>+</sup> | 3           |

790

791 Three biological replicates of each sample typed were submitted for analysis.

792 **Table 2.** Numbers of differentially expressed genes

|                                  | Human                     |                      |                           | Murine                                                           |                            |                         |
|----------------------------------|---------------------------|----------------------|---------------------------|------------------------------------------------------------------|----------------------------|-------------------------|
|                                  | Unstimulated<br>MAIT      | Stimulated<br>MAIT   | Stimulated<br>MAIT        | Acute<br>infection<br>MAIT                                       | Resolved<br>infection MAIT | Reinfection<br>MAIT     |
|                                  | v                         | v                    | v                         | v                                                                | v                          | v                       |
|                                  | Unstimulated<br>CD8+45RA+ | Unstimulated<br>MAIT | Unstimulated<br>CD8+45RA+ | Uninfected<br>CD8 <sup>+</sup> 44 <sup>Lo</sup> 62 <sup>Hi</sup> | Acute infection<br>MAIT    | Acute infection<br>MAIT |
| Number of<br>upregulated genes   | 411                       | 1384                 | 1651                      | 1985                                                             | 942                        | 235                     |
| Number of<br>downregulated genes | 557                       | 1843                 | 2512                      | 1773                                                             | 947                        | 241                     |

793

794 Genes shown are censored at FDR  $P \leq 0.05$  and  $\log(2)$  fold change of  $\pm 1$ .

795

796  
797

**Table 3.** Differentially expressed cytokine genes. Human.

| Stimulated MAIT        |                 |          |     |         |             | Stimulated MAIT   |                 |          |     |         |             | Unstimulated MAIT      |                 |          |     |         |             |
|------------------------|-----------------|----------|-----|---------|-------------|-------------------|-----------------|----------|-----|---------|-------------|------------------------|-----------------|----------|-----|---------|-------------|
| v                      |                 |          |     |         |             | v                 |                 |          |     |         |             | v                      |                 |          |     |         |             |
| Unstimulated CD8+45RA+ |                 |          |     |         |             | Unstimulated MAIT |                 |          |     |         |             | Unstimulated CD8+45RA+ |                 |          |     |         |             |
| Gene                   | Log fold change | Log CP M | LR  | P value | FDR P value | Gene              | Log fold change | Log CP M | LR  | P value | FDR P value | Gene                   | Log fold change | Log CP M | LR  | P value | FDR P value |
| CSF2                   | 15              | 7.4      | 62  | 3E-15   | 0.00        | CSF2              | 15              | 7.4      | 64  | 1E-15   | 0.00        | LIF                    | 4.7             | 1.8      | 7.2 | 0.007   | 0.02        |
| IL17A                  | 12              | 4.9      | 74  | 8E-18   | 0.00        | IL17A             | 12              | 4.9      | 77  | 1E-18   | 0.00        | TGFA                   | 4.4             | 3.3      | 43  | 6E-11   | 0.00        |
| IL2                    | 11              | 4.0      | 42  | 1E-10   | 0.00        | IFNG              | 9.7             | 8.4      | 61  | 6E-15   | 0.00        | TNF                    | 2.4             | 9.0      | 7.9 | 0.005   | 0.02        |
| LIF                    | 8.9             | 1.8      | 26  | 3E-07   | 0.00        | IL17F             | 8.3             | 1.2      | 35  | 3E-09   | 0.00        | TNFSF13B               | 2.3             | 3.3      | 9.5 | 0.002   | 0.01        |
| TNF                    | 8.7             | 9.0      | 59  | 2E-14   | 0.00        | IL2               | 8.0             | 4.0      | 33  | 1E-08   | 0.00        | TNFSF14                | 2.1             | 8.0      | 22  | 2E-06   | 0.00        |
| IFNG                   | 8.4             | 8.4      | 51  | 1E-12   | 0.00        | TNF               | 6.3             | 9.0      | 38  | 8E-10   | 0.00        | CSF1                   | 2.0             | 5.1      | 21  | 7E-06   | 0.00        |
| IL17F                  | 8.3             | 1.2      | 32  | 1E-08   | 0.00        | LIF               | 4.2             | 1.8      | 12  | 0.0005  | 0.00        | IL15                   | 1.9             | 2.3      | 5.8 | 0.02    | 0.04        |
| TNFSF14                | 5.3             | 8.0      | 113 | 2E-26   | 0.00        | IL10              | 4.1             | 1.5      | 14  | 0.0002  | 0.00        | IL24                   | -1.8            | 2.4      | 6.2 | 0.01    | 0.04        |
| CSF1                   | 5.2             | 5.1      | 120 | 7E-28   | 0.00        | TNFSF14           | 3.2             | 8.0      | 52  | 6E-13   | 0.00        | CXCR2                  | -4.0            | 3.0      | 9.7 | 0.001   | 0.01        |
| IL26                   | 4.6             | 1.8      | 16  | 7E-05   | 0.00        | CSF1              | 3.2             | 5.1      | 59  | 2E-14   | 0.00        | CXCR1                  | -4.1            | 2.6      | 14  | 0.0001  | 0.00        |
| LTA                    | 3.3             | 7.0      | 48  | 4E-12   | 0.00        | LTA               | 3.1             | 7.0      | 43  | 7E-11   | 0.00        |                        |                 |          |     |         |             |
| TGFA                   | 2.9             | 3.3      | 19  | 1E-05   | 0.00        | IL16              | -1.1            | 9.3      | 5.6 | 0.018   | 0.04        |                        |                 |          |     |         |             |
| TNFSF13B               | 2.6             | 3.2      | 12  | 0.0004  | 0.00        | TGFA              | -1.6            | 3.3      | 7.4 | 0.006   | 0.02        |                        |                 |          |     |         |             |

|        |      |     |     |        |      |        |      |     |    |         |      |
|--------|------|-----|-----|--------|------|--------|------|-----|----|---------|------|
| IL23A  | 2.3  | 4.7 | 12  | 0.0004 | 0.00 | IL32   | -1.6 | 9.7 | 20 | 8.1E-06 | 0.00 |
| IL32   | -1.2 | 9.7 | 12  | 0.0005 | 0.00 | IL18BP | -3.0 | 5.1 | 40 | 2.9E-10 | 0.00 |
| IL16   | -1.5 | 9.3 | 11  | 0.001  | 0.00 | CXCR1  | -5.7 | 2.6 | 13 | 0.0004  | 0.00 |
| IL24   | -2.0 | 2.4 | 7.7 | 0.005  | 0.01 |        |      |     |    |         |      |
| IL18BP | -3.6 | 5.1 | 57  | 6E-14  | 0.00 |        |      |     |    |         |      |
| CXCR2  | -4.9 | 3.0 | 13  | 0.0002 | 0.00 |        |      |     |    |         |      |
| CXCR1  | -9.8 | 2.6 | 37  | 1E-09  | 0.00 |        |      |     |    |         |      |

798

799 Genes shown are censored at FDR  $P \leq 0.05$  and  $\log(2)$  fold change of  $\pm 1$ , and ordered by log fold change. Genes highlighted in bold are

800 differentially expressed in both human and mouse. CPM, Counts per million; FDR, false discovery rate; LR, likelihood ratio.

801

802 **Table 4.** Differentially expressed cytokine genes. Mouse.

| Acute infection MAIT                                               |                 |         |     |         |             | Resolved infection MAIT cells   |                 |         |     |         |             |
|--------------------------------------------------------------------|-----------------|---------|-----|---------|-------------|---------------------------------|-----------------|---------|-----|---------|-------------|
| v<br>Uninfected CD8 <sup>+</sup> 44 <sup>Lo</sup> 62 <sup>Hi</sup> |                 |         |     |         |             | v<br>Acute infection MAIT cells |                 |         |     |         |             |
| Gene                                                               | Log fold change | Log CPM | LR  | P value | FDR P value | Gene                            | Log fold change | Log CPM | LR  | P value | FDR P value |
| <b>Il17a</b>                                                       | 14              | 7.3     | 316 | 9E-71   | 1E-68       | Tnfsf18 (GITRL)                 | 5.9             | -0.52   | 14  | 0.0002  | 0.001       |
| <b>Ifng</b>                                                        | 12              | 5.9     | 222 | 3E-50   | 2E-48       | Tnfsf11 (TRANCE)                | 3.2             | 6.6     | 67  | 3E-16   | 4E-14       |
| <b>Csf2</b>                                                        | 11              | 4.8     | 208 | 4E-47   | 3E-45       | Il15                            | 1.9             | 0.88    | 6.7 | 0.0096  | 0.03        |
| <b>Il17f</b>                                                       | 11              | 4.9     | 171 | 5E-39   | 2E-37       | Tgfb3                           | 1.4             | 4.0     | 16  | 6E-05   | 0.0005      |
| <b>Lif</b>                                                         | 10              | 3.6     | 132 | 1E-30   | 5E-29       | Il6st                           | 1.3             | 6.7     | 9.9 | 0.002   | 0.008       |
| Il22                                                               | 9.1             | 2.4     | 43  | 4E-11   | 4E-10       | Il17f                           | 1.1             | 4.9     | 8.5 | 0.004   | 0.02        |
| Il21                                                               | 7.5             | 0.65    | 23  | 2-06    | 1E-05       | Il21                            | -3.8            | 0.65    | 11  | 0.0008  | 0.005       |
| <b>Tnf</b>                                                         | 4.5             | 6.0     | 188 | 1E-42   | 6E-41       | Il17a                           | -2.4            | 7.3     | 38  | 9E-10   | 38E-08      |
| <b>Lta (TNFb / lymphotoxin A)</b>                                  | 3.8             | 6.2     | 110 | 9E-26   | 3E-24       | Ifng                            | -2.4            | 5.9     | 35  | 3E-09   | 8E-08       |
| <b>Il1b</b>                                                        | 2.6             | 4.5     | 6.2 | 0.01    | 0.03        | Tnfsf10 (TRAIL)                 | -1.6            | 4.0     | 19  | 2E-05   | 0.0002      |
| Tnfsf11 (TRANCE)                                                   | 2.3             | 6.6     | 35  | 3E-09   | 2E-08       | <b>Lif</b>                      | -1.4            | 3.6     | 11  | 0.0009  | 0.005       |
| <b>Csf1 (M-CSF)</b>                                                | 2.3             | 3.0     | 11  | 0.0009  | 0.003       |                                 |                 |         |     |         |             |
| Tnfsf10 (TRAIL)                                                    | 1.1             | 4.0     | 9.7 | 0.002   | 0.005       |                                 |                 |         |     |         |             |

803  
804  
805  
806  
807  
808

809  
810

---

Reinfection MAIT cells

v

Acute infection MAIT cells

---

| <b>Gene</b>      | <b>Log fold change</b> | <b>Log CPM</b> | <b>LR</b> | <b>P value</b> | <b>FDR P value</b> |
|------------------|------------------------|----------------|-----------|----------------|--------------------|
| Csf1 (M-CSF)     | 2.2                    | 3.0            | 12        | 0.0006         | 0.01               |
| Il6st            | 1.5                    | 6.7            | 14        | 0.0002         | 0.005              |
| Tnfsf11 (TRANCE) | 1.3                    | 6.6            | 14        | 0.0002         | 0.007              |
| Il17a            | -1.5                   | 7.3            | 15        | 9.7E-05        | 0.003              |
| Csf2 (GM-CSF)    | -1.2                   | 4.8            | 12        | 0.0006         | 0.01               |

---

811  
812 Genes shown are censored at FDR  $P \leq 0.05$  and  $\log(2)$  fold change of  $\pm 1$ , and ordered by log fold change. Genes highlighted in bold are  
813 differentially expressed in both human and mouse. CPM, Counts per million; FDR, false discovery rate; LR, likelihood ratio.

814



815 **Table 5. Gene set enrichment analysis for Tissue Repair set.**

| Human             |                   |                   |                          |                 | Murine             |                   |                   |                          |                 |
|-------------------|-------------------|-------------------|--------------------------|-----------------|--------------------|-------------------|-------------------|--------------------------|-----------------|
| Stimulated MAIT   |                   |                   |                          |                 | Acute infection    |                   |                   |                          |                 |
| v                 |                   |                   |                          |                 | v                  |                   |                   |                          |                 |
| Unstimulated MAIT |                   |                   |                          |                 | Resolved infection |                   |                   |                          |                 |
| Gene              | Rank in gene list | Rank metric score | Running Enrichment score | Core enrichment | Gene               | Rank in gene list | Rank metric score | Running Enrichment score | Core enrichment |
| CCL3              | 16                | 7.566             | 0.180                    | Yes             | HBEGF              | 5                 | 12.242            | 0.162                    | Yes             |
| <b>TNF</b>        | 63                | 4.421             | 0.282                    | Yes             | <b>CSF2</b>        | 33                | 11.994            | 0.319                    | Yes             |
| <b>CSF2</b>       | 85                | 4.012             | 0.376                    | Yes             | <b>MMP25</b>       | 97                | 7.929             | 0.417                    | Yes             |
| VEGFA             | 87                | 3.990             | 0.471                    | Yes             | CXCL10             | 210               | 5.741             | 0.481                    | Yes             |
| CSF1              | 105               | 3.700             | 0.559                    | Yes             | AREG               | 216               | 5.579             | 0.555                    | Yes             |
| THBS1             | 226               | 2.790             | 0.614                    | Yes             | JAG1               | 234               | 5.371             | 0.625                    | Yes             |
| <b>HIF1A</b>      | 594               | 1.725             | 0.618                    | Yes             | <b>TNF</b>         | 311               | 4.744             | 0.679                    | Yes             |
| <b>FURIN</b>      | 1763              | 0.836             | 0.522                    | No              | <b>PDGFB</b>       | 375               | 4.226             | 0.729                    | Yes             |
| <b>VEGFB</b>      | 2560              | 0.539             | 0.456                    | No              | TGFB3              | 414               | 3.921             | 0.777                    | Yes             |
| MMP28             | 3207              | 0.339             | 0.399                    | No              | CXCL2              | 529               | 3.295             | 0.808                    | Yes             |
| HMGB1             | 5005              | -0.120            | 0.223                    | No              | <b>FURIN</b>       | 721               | 2.474             | 0.820                    | Yes             |
| <b>PTGES2</b>     | 5279              | -0.189            | 0.200                    | No              | IL1B               | 772               | 2.296             | 0.845                    | Yes             |
| <b>PDGFB</b>      | 5399              | -0.218            | 0.194                    | No              | <b>TGFB1</b>       | 1134              | 1.427             | 0.824                    | No              |
| <b>TGFB1</b>      | 5973              | -0.374            | 0.146                    | No              | <b>HIF1A</b>       | 1464              | 1.033             | 0.802                    | No              |
| DISP1             | 6691              | -0.589            | 0.088                    | No              | THBS1              | 1761              | 0.801             | 0.780                    | No              |
| TGFA              | 9539              | -2.469            | -0.136                   | No              | <b>VEGFB</b>       | 2604              | 0.398             | 0.692                    | No              |
| <b>MMP25</b>      | 9697              | -2.794            | -0.085                   | No              | <b>HMGB1</b>       | 3518              | 0.118             | 0.594                    | No              |
| WNT1              | 10012             | -4.987            | 0.003                    | No              | <b>PTGES2</b>      | 4382              | -0.084            | 0.500                    | No              |

---

816 Genes set enrichment analysis (GSEA) was used to determine potential enrichment of a tissue repair signature<sup>21</sup> in gene expression  
817 profiles of 5-OP-RU-stimulated human peripheral blood MAIT cells compared with unstimulated MAIT cells (left) and of murine  
818 pulmonary MAIT cells 7 days post i.n. *L. longbeachae* infection, compared with MAIT cells 12 weeks post infection (right). Genes are  
819 ordered by their position in the list of genes ranked by their normalised enrichment score (ES). Genes highlighted in bold are also  
820 significant in the equivalent analysis for murine MAIT cells. Running enrichment score: ES at this point in the ranked list of genes.  
821 Core enrichment genes contribute to the leading-edge subset of genes that contribute most to the enrichment result.

DISP1 8193 -1.502 0.101 No

822 **Supplementary table S1. Toll like receptor agonists used in murine**  
823 **experiments**

824 **Supplementary table S2. Comprehensive list of differentially expressed**  
825 **genes. Human.**

826 Genes shown are censored at FDR  $P \leq 0.05$  and  $\log(2)$  fold change of  $\pm 1$ , and ordered by  
827 log fold change. CPM, Counts per million; FDR, false discovery rate; LR, likelihood ratio.

828 **Supplementary table S3. Comprehensive list of differentially expressed**  
829 **genes. Murine.**

830 Genes shown are censored at FDR  $P \leq 0.05$  and  $\log(2)$  fold change of  $\pm 1$ , and ordered by  
831 log fold change. CPM, Counts per million; FDR, false discovery rate; LR, likelihood ratio.

832 **Supplementary table S4. TCR usage overrepresented genes. Human.**

833 Genes shown are censored at FDR  $P \leq 0.05$  and  $\log(2)$  fold change of  $\pm 1$ , and ordered by  
834 log fold change. CPM, Counts per million; FDR, false discovery rate; LR, likelihood ratio.

835 **Supplementary table S5. TCR usage overrepresented genes. Murine.**

836 Genes shown are censored at FDR  $P \leq 0.05$  and  $\log(2)$  fold change of  $\pm 1$ , and ordered by  
837 log fold change. CPM, Counts per million; FDR, false discovery rate; LR, likelihood ratio.

838 **Supplementary table S6. Differentially expressed cytokine receptors.**  
839 **Human.**

840 Genes associated with formation of T cell memory which are found to be differentially  
841 expressed in this dataset. Genes shown are censored at FDR  $P \leq 0.05$  and ordered by log  
842 fold change. CPM, Counts per million; FDR, false discovery rate; LR, likelihood ratio.

843 **Supplementary table S7. Differentially expressed cytokine receptors.**

844 **Murine.**

845 Genes shown are censored at FDR  $P \leq 0.05$  and  $\log(2)$  fold change of  $\pm 1$ , and ordered by  
846 log fold change. CPM, Counts per million; FDR, false discovery rate; LR, likelihood ratio.

847 **Supplementary table S8. Differentially expressed surface markers**

848 **(Cluster of Differentiation molecules). Human**

849 Genes shown are censored at FDR  $P \leq 0.05$  and  $\log(2)$  fold change of  $\pm 1$ , and ordered by  
850 log fold change. CPM, Counts per million; FDR, false discovery rate; LR, likelihood ratio.

851 **Supplementary table S9. Differentially expressed surface markers**

852 **(Cluster of Differentiation molecules). Murine.**

853 Genes shown are censored at FDR  $P \leq 0.05$  and  $\log(2)$  fold change of  $\pm 1$ , and ordered by  
854 log fold change. CPM, Counts per million; FDR, false discovery rate; LR, likelihood ratio.

855 **Supplementary table S10. Differentially expressed chemokines. Human.**

856 Genes shown are censored at FDR  $P \leq 0.05$  and  $\log(2)$  fold change of  $\pm 1$ , and ordered by  
857 log fold change. Genes highlighted in bold are also significant in the equivalent analysis  
858 for murine MAIT cells. CPM, Counts per million; FDR, false discovery rate; LR,  
859 likelihood ratio.

860 **Supplementary table S11. Differentially expressed chemokines. Murine.**

861 Genes shown are censored at FDR  $P \leq 0.05$  and  $\log(2)$  fold change of  $\pm 1$ , and ordered by  
862 log fold change. Genes highlighted in bold are also significant in the equivalent analysis  
863 for human MAIT cells. CPM, Counts per million; FDR, false discovery rate; LR, likelihood  
864 ratio.

865 **Supplementary table S12. Differentially expressed chemokine receptors.**

866 **Human.**

867 Genes shown are censored at FDR  $P \leq 0.05$  and  $\log(2)$  fold change of  $\pm 1$ , and ordered by  
868 log fold change. Genes highlighted in bold are also significant in the equivalent analysis  
869 for murine MAIT cells. CPM, Counts per million; FDR, false discovery rate; LR,  
870 likelihood ratio.

871 **Supplementary table S13. Differentially expressed chemokine receptors.**

872 **Murine.**

873 Genes shown are censored at FDR  $P \leq 0.05$  and  $\log(2)$  fold change of  $\pm 1$ , and ordered by  
874 log fold change. Genes highlighted in bold are also significant in the equivalent analysis  
875 for human MAIT cells. CPM, Counts per million; FDR, false discovery rate; LR, likelihood  
876 ratio.

877 **Supplementary table S14. Tissue repair gene signature.**

878 Murine tissue repair signature gene set from Linehan *et al*<sup>21</sup> used in both murine and human  
879 GSEA analyses.

880 **Supplementary table S15. Cytometry antibodies.**

881

882 Figure 1

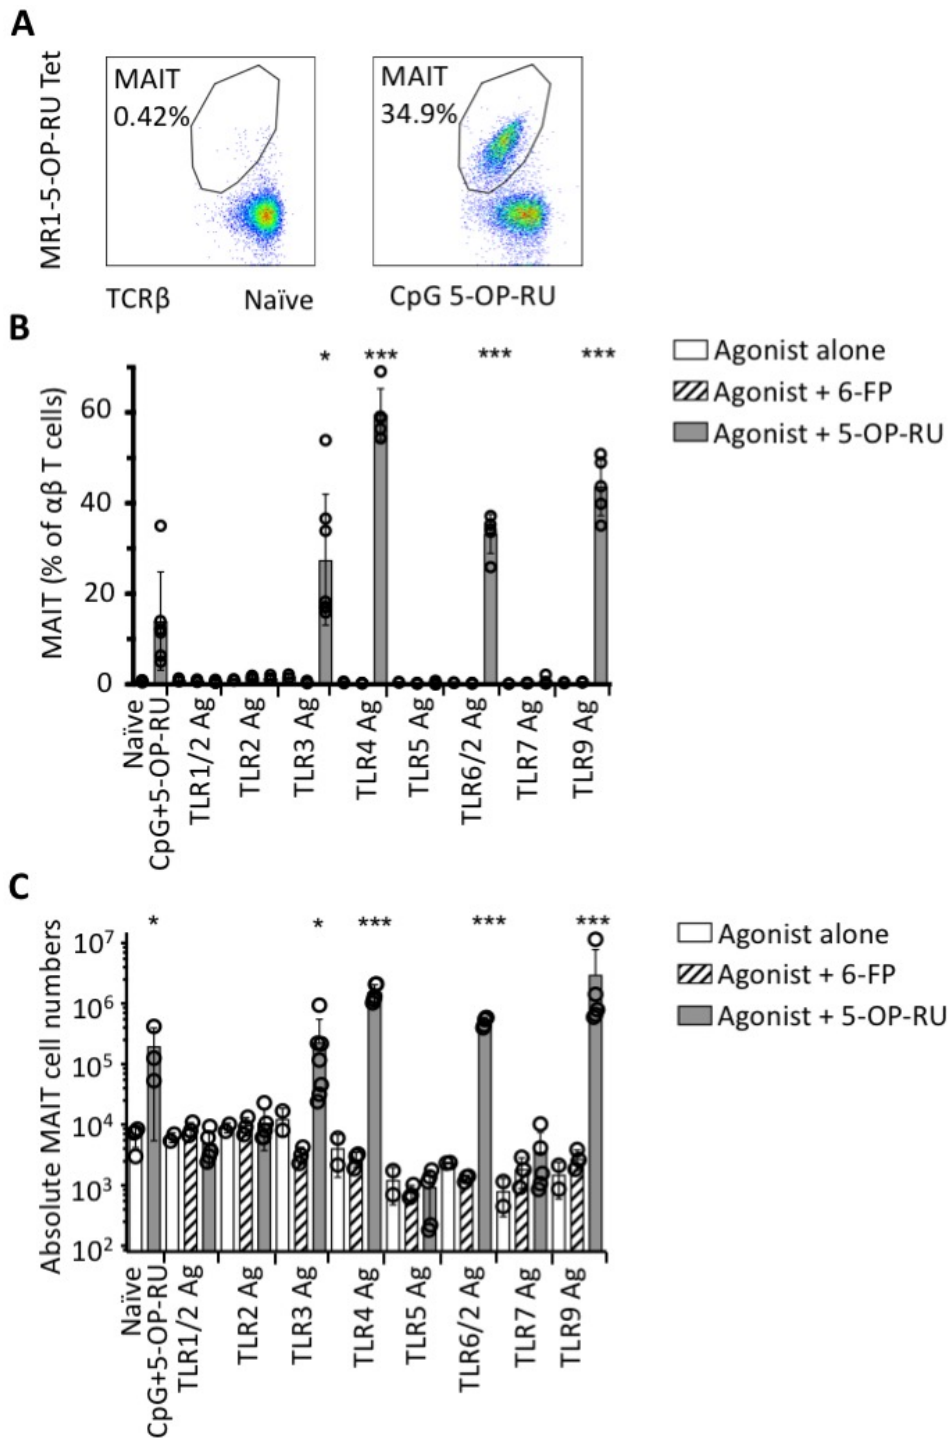

883

884 Figure 2

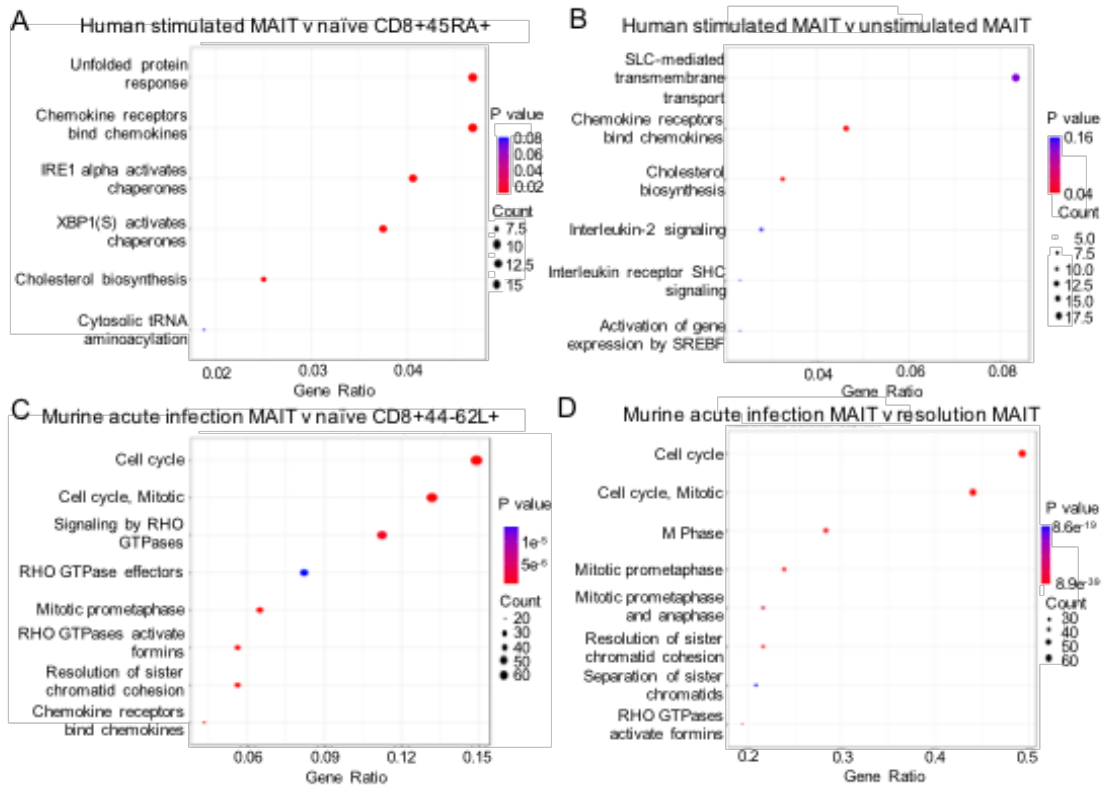

885  
886

887 Figure 3

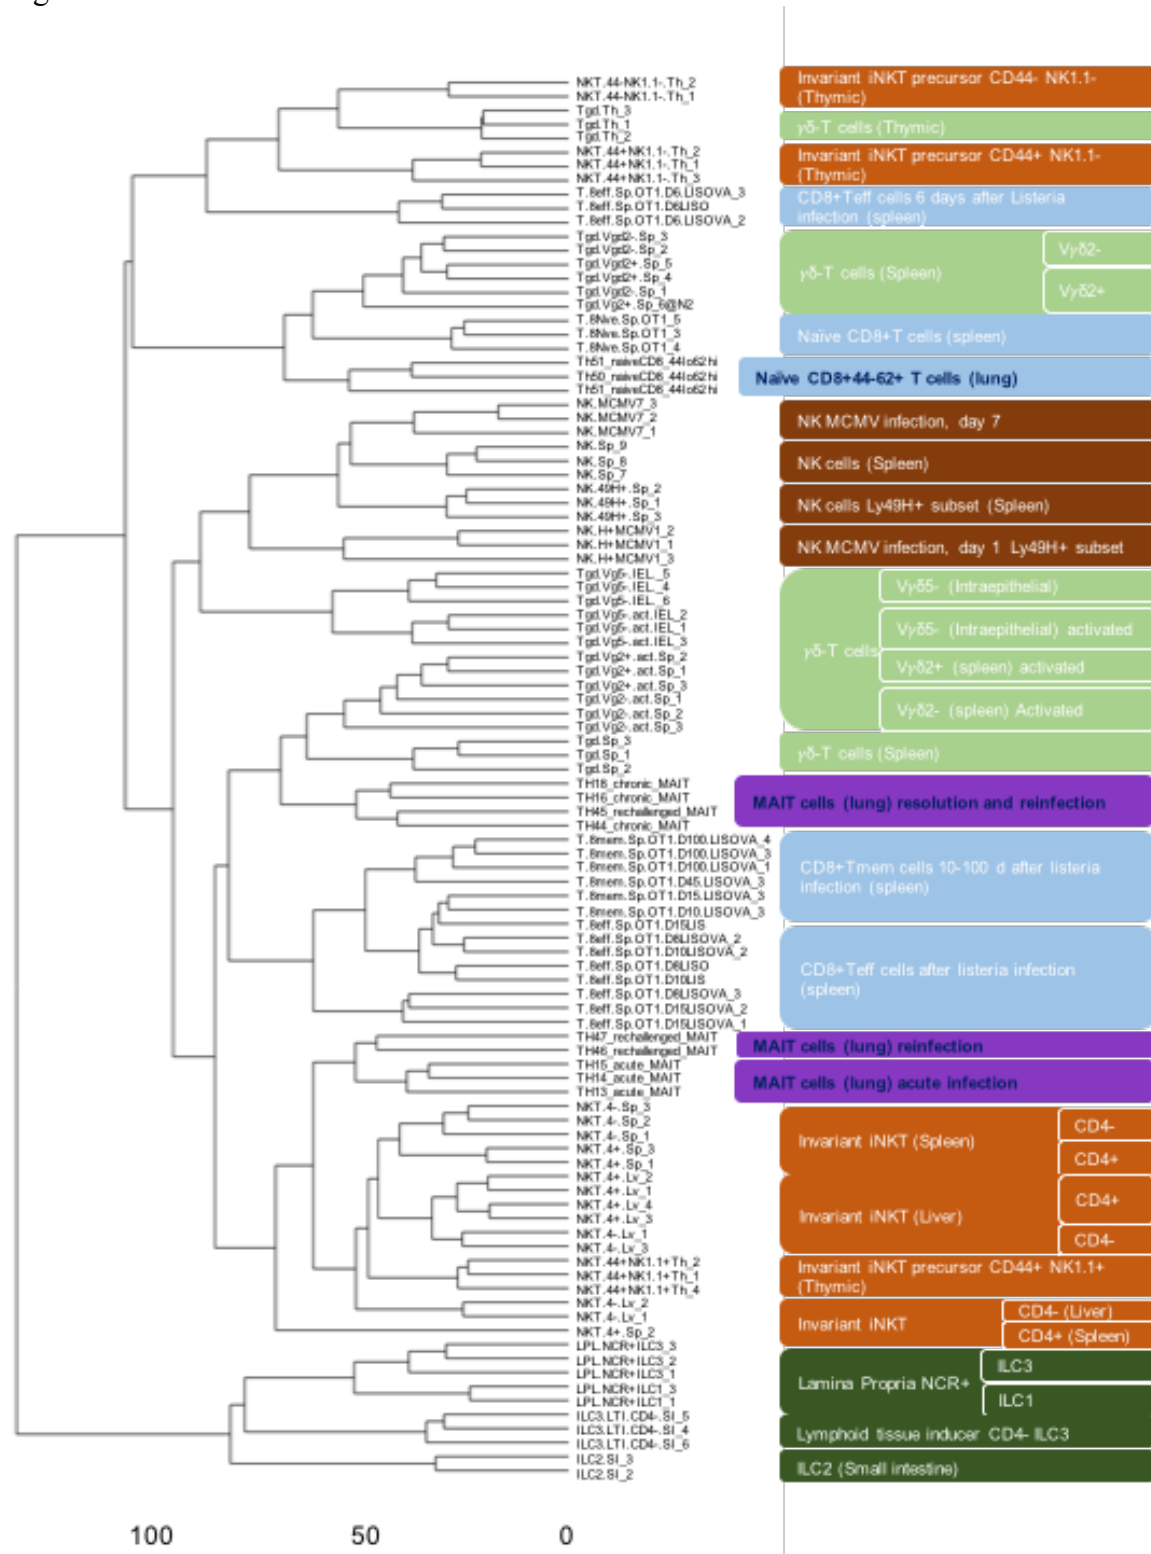



890 Figure 4

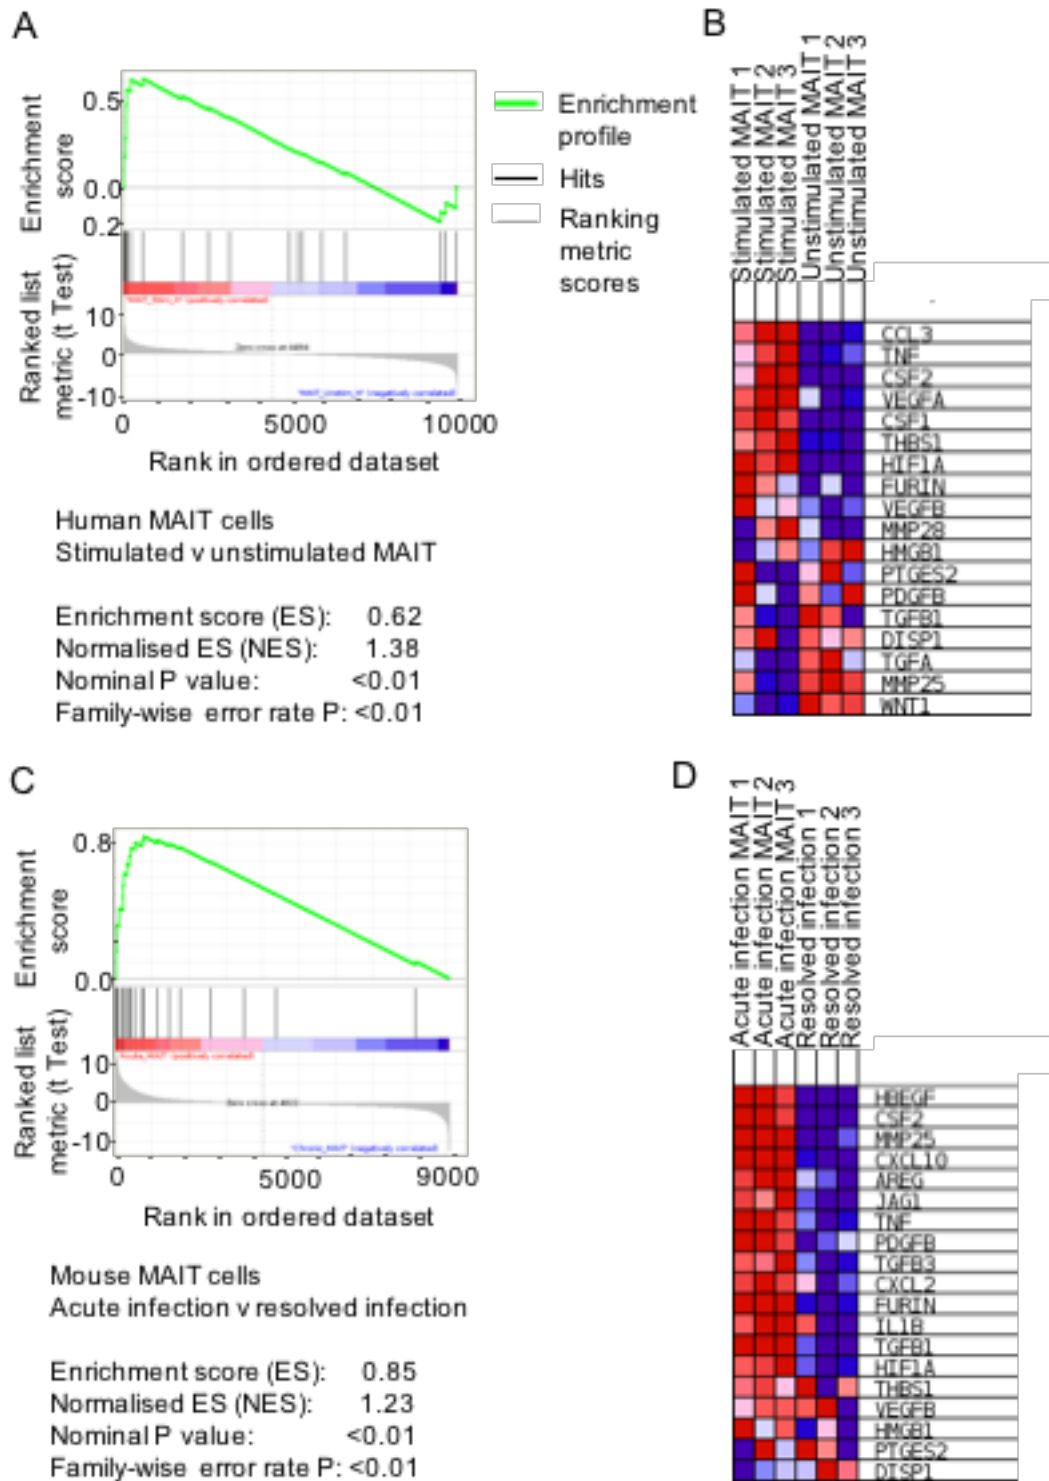

891  
892

893 Supplementary figure S1

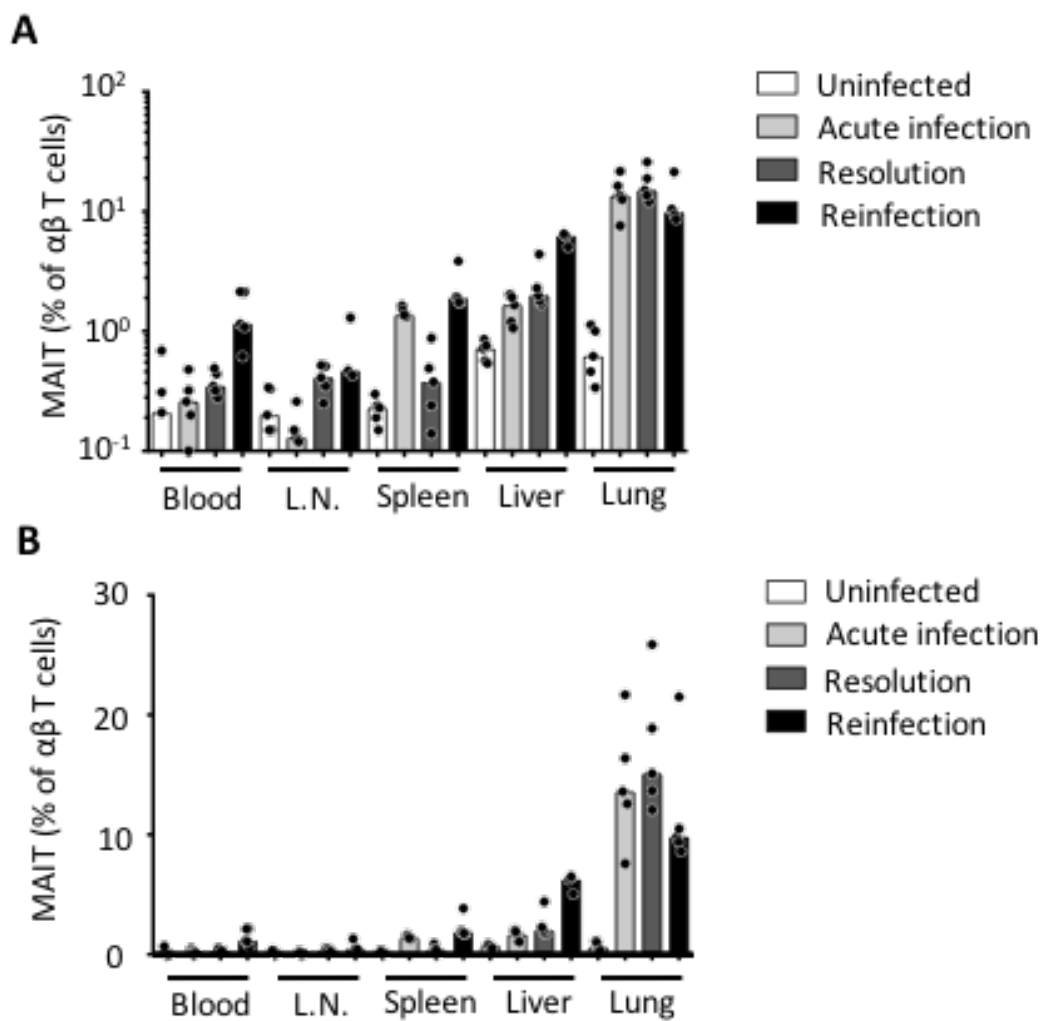

894

895

896

897 Supplementary figure S2

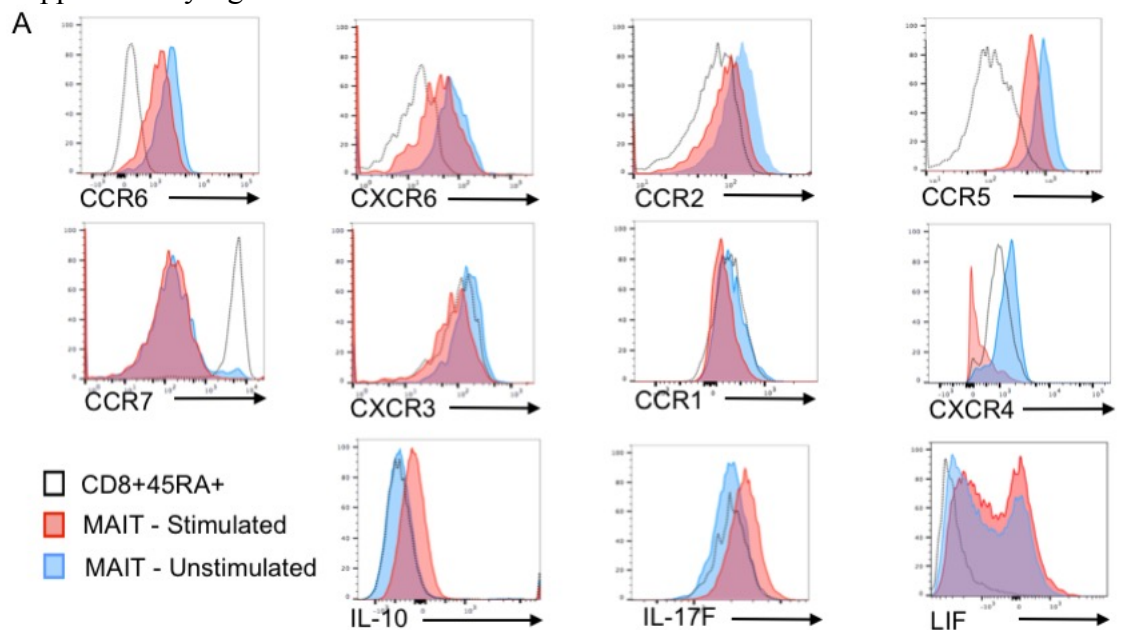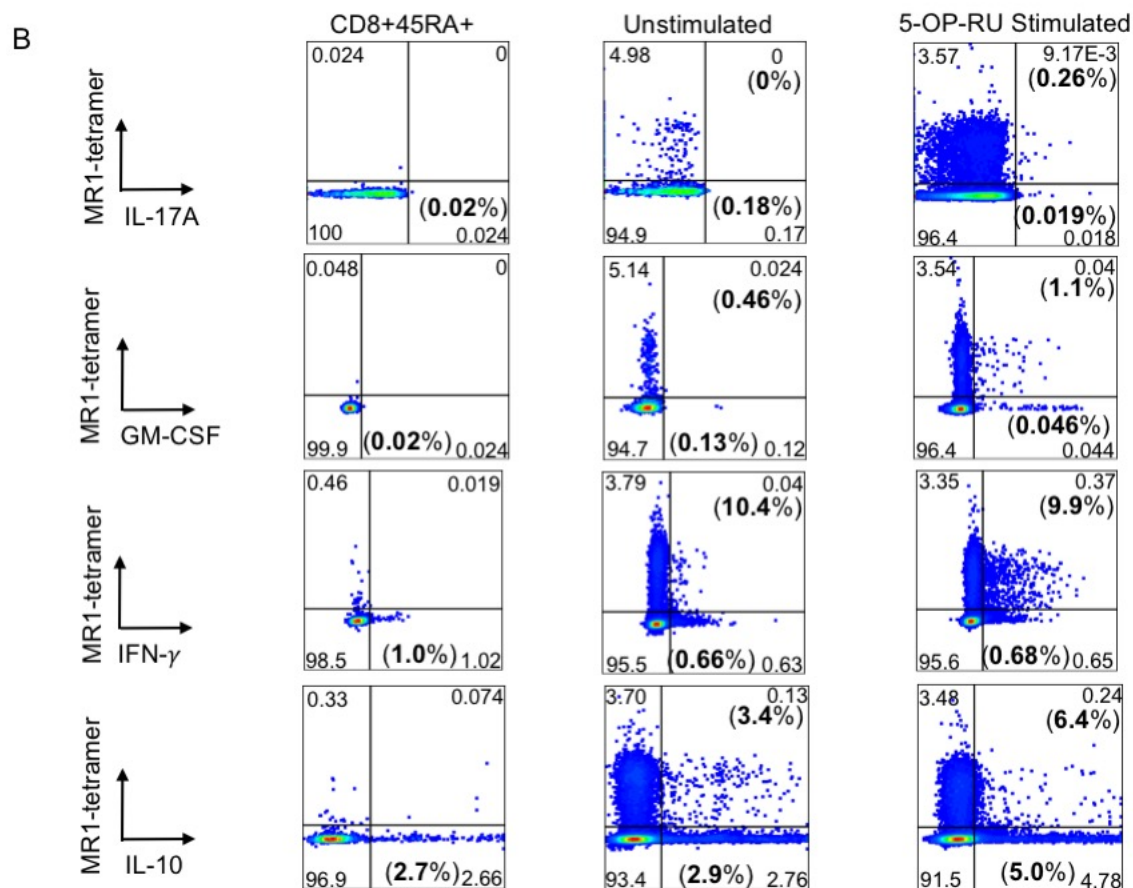

898  
899

900 Supplementary figure S3

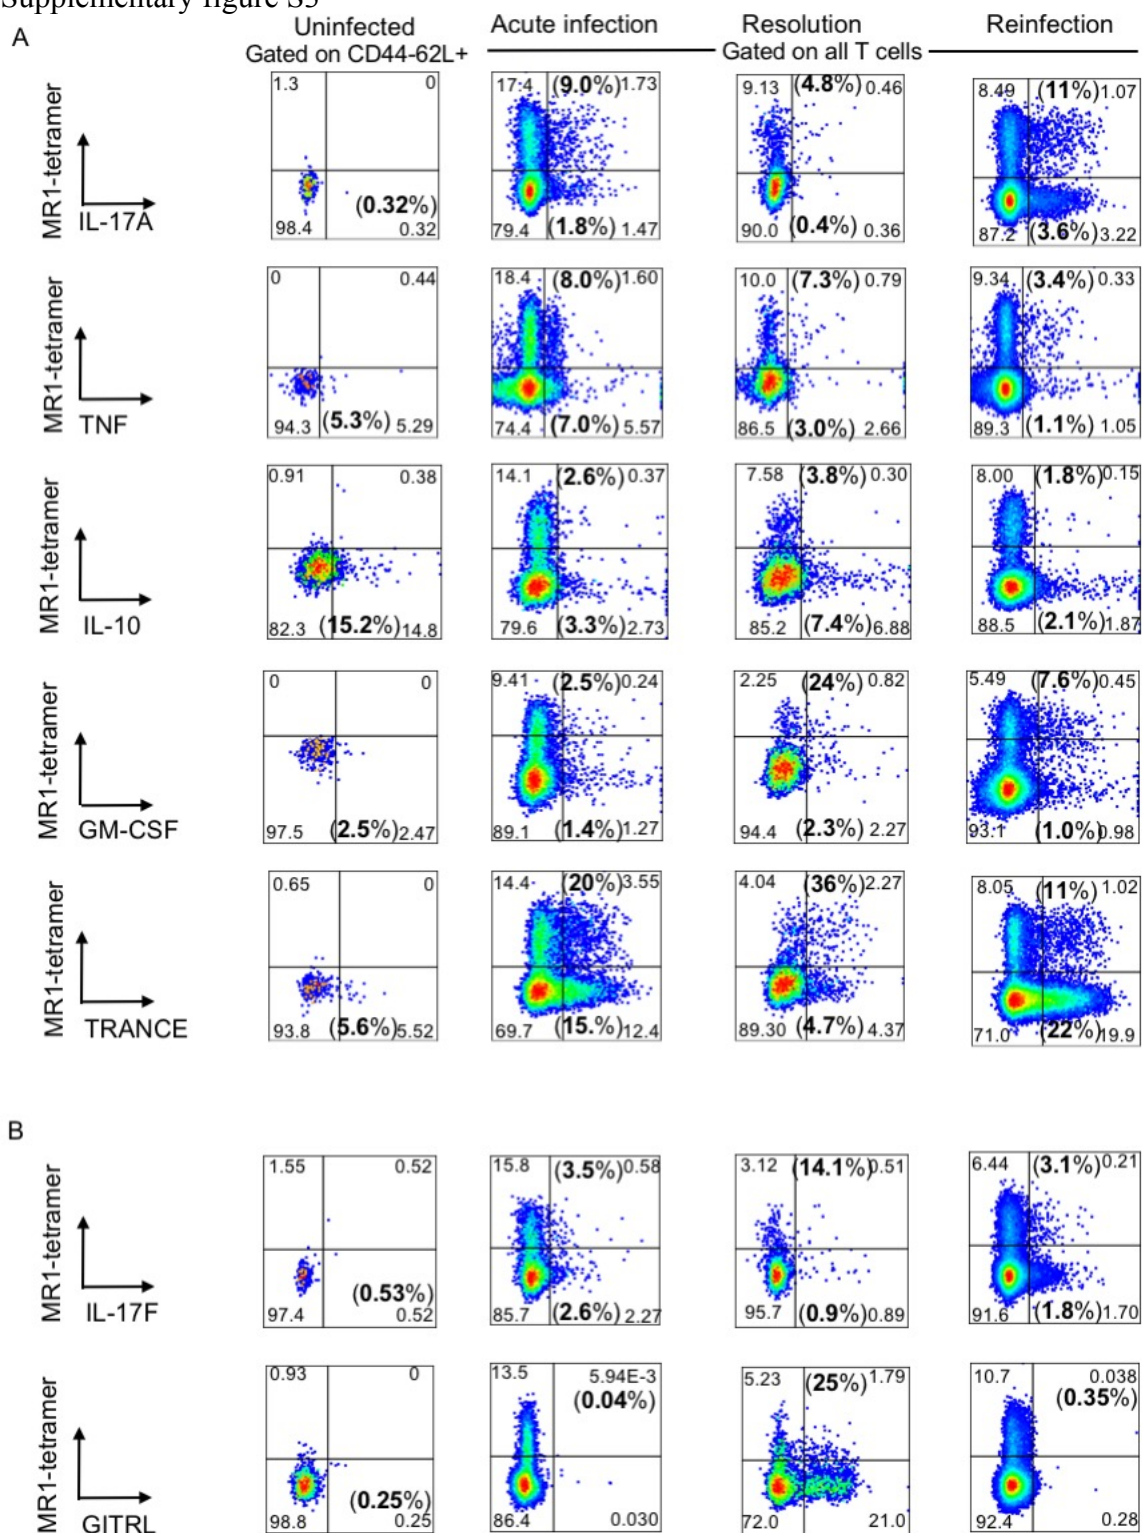

901  
902

903 Supplementary figure S4  
904

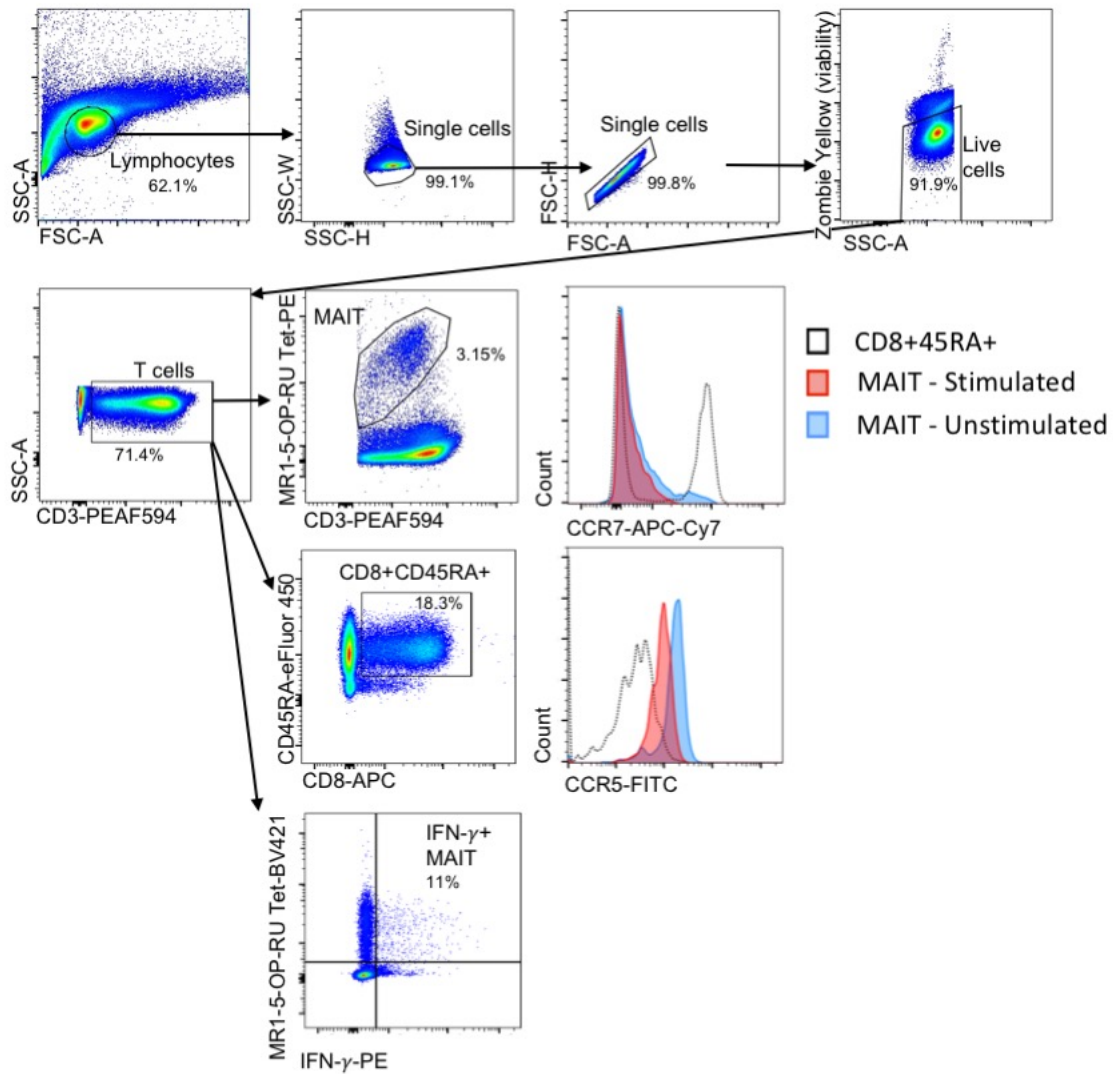

905

906 Supplementary figure S5

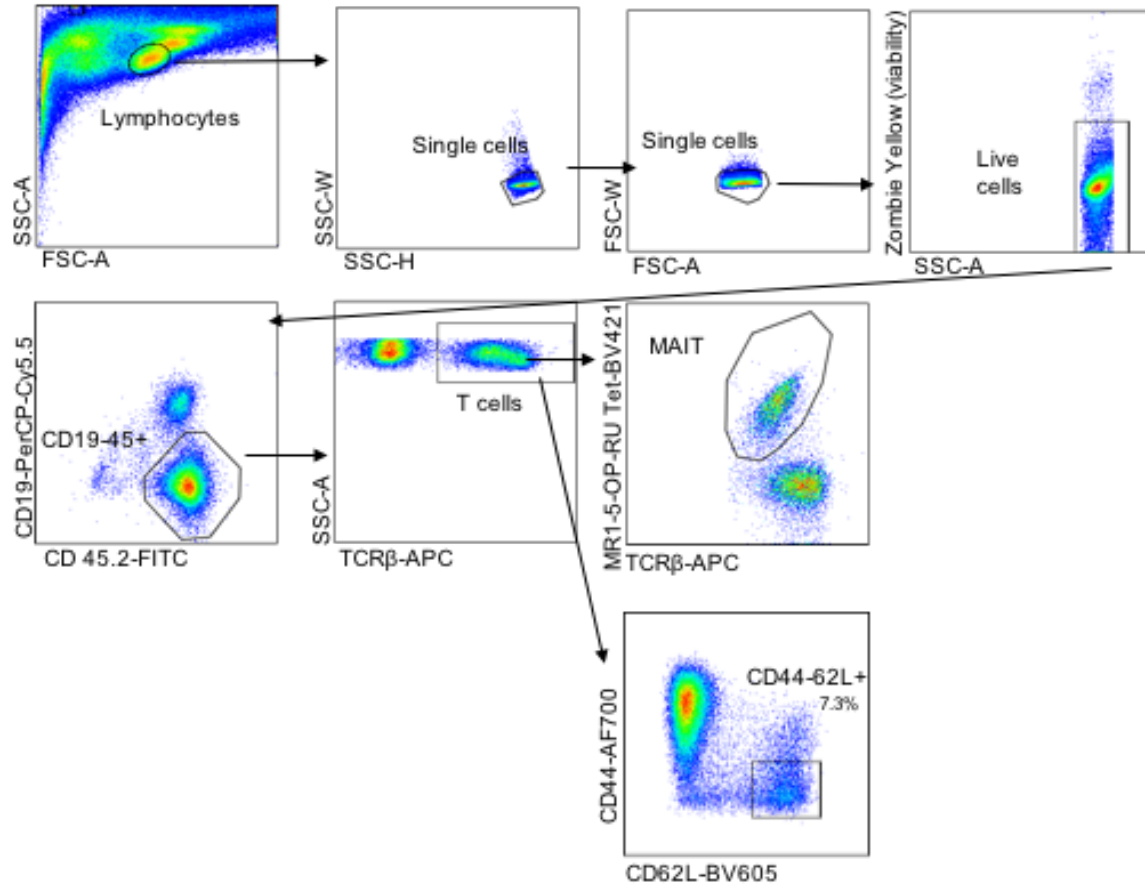

907
